# Supplementary material for: An electrochemical off–on method for pyrimidin-2(1H)-one synthesis via three-component cyclization
Source: Royal Society of Chemistry journal article supplement (doi:10.1039/c9gc02005e), 2019-01-01
Supplement: c9gc02005e1.pdf [file c9gc02005e1.pdf]

**Supporting information for**  
**An Electrochemical Off-On Method for Pyrimidin-**  
**2(1H)-ones Synthesis via Three-component**  
**Cyclization**

Yanyan Kong, Yabo Li, Mengmeng Huang, Jung Keun Kim\* and Yangjie Wu\*

*College of Chemistry and Molecular Engineering, Henan Key Laboratory of Chemical Biology and Organic Chemistry, Key Laboratory of Applied Chemistry of Henan Universities, Zhengzhou University, Zhengzhou 450052, P.R. China.*

**Experimental details and spectroscopic data**

**Contents**

|                                                                          |     |
|--------------------------------------------------------------------------|-----|
| 1. General Information.....                                              | S2  |
| 2. Experimental Procedure.....                                           | S2  |
| 3. Cyclic Voltammetry Experiments .....                                  | S2  |
| 4. Characterization Data .....                                           | S4  |
| 5. <sup>1</sup> H, <sup>13</sup> C and <sup>19</sup> F NMR Spectra ..... | S12 |
| 6. Determination of Structure of <b>4a</b> .....                         | S39 |

# 1. General Information

All reagents were used in analytical grades and were obtained from commercial sources without further purification unless otherwise noted. Some diketones were purchased from commercial suppliers or prepared according to reported procedures (**1i**, **1k-1n**, **1q-1r**).<sup>1</sup> Electrolysis was conducted using a DC power supply (MWSTEK DP3005B) in constant current mode. The anode electrode is platinum plate electrode (10 mm × 10 mm × 0.2 mm) and cathode electrode is graphite rod ( $\Phi = 6$  mm). Analytical thin-layer chromatography (TLC) was performed on Merck silica gel aluminum plates with F-254 indicator, visualized by irradiation with UV light. Flash chromatography columns were packed with 200-300 mesh silica gel and silica gel was purchased from Qing Dao Hai Yang Chemical Industry. <sup>1</sup>H NMR and <sup>13</sup>C NMR spectra were recorded on a Bruker DPX-400 spectrometer in CDCl<sub>3</sub>. All chemical shifts ( $\delta$ ) are reported in ppm and coupling constants ( $J$ ) in Hz relative to tetramethylsilane as internal standard ( $\delta = 0$  ppm). For the <sup>19</sup>F spectra,  $\alpha$ -trifluorotoluene served as external standard ( $\delta = -63.9$  ppm). High resolution mass spectra (HRMS) were obtained on an Agilent LC-MSD-Trap-XCT spectrometer with micromass MS software using electrospray ionization (ESI). The Cyclic voltammetry (CV) was recorded in CH<sub>3</sub>CN by CHI650A.

# 2. Experimental Procedure

## General procedure for the electrochemical one-pot synthesis of pyrimidin-2(1H)-ones

Compounds **1** (0.3 mmol), **2** (0.75 mmol) and **3** (0.6 mmol) were heated at 105 °C under air for 9 h. Then EtOH (5 mL) and TBAPF<sub>6</sub> (0.5 mmol) were added into the reaction mixture. The resulting solution was electrolyzed with a C|Pt electrode under a constant current (5 mA) in an undivided cell at 25 °C for 10 hours. After electrolysis, the product was purified by column chromatography on silica gel (elute: dichloromethane/EtOH 80/1-40/1, v/v) to give the desired product.

# 3. Cyclic Voltammetry Experiments

Cyclic voltammetry was measured under Ar balloon protection with conventional three-electrode system (Reference electrode: Ag/AgCl, working electrode: Glassy carbon, counter electrode: Pt wire, Supporting electrolyte: 0.1 M TBAPF<sub>6</sub> in CH<sub>3</sub>CN) at different scan rates (40, 50, 60, 80, 100, 120, 150, 200, 220, 250, and 280 mV/s).

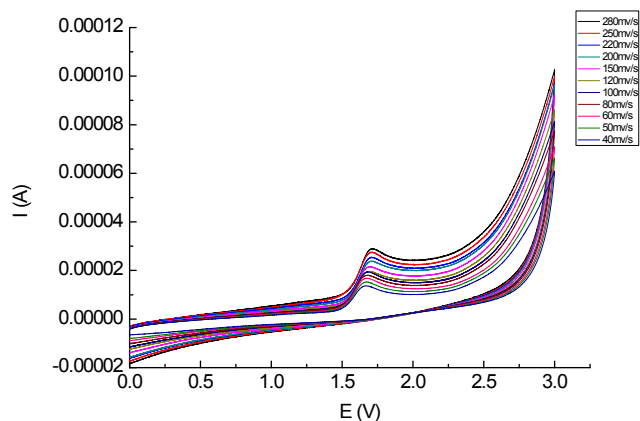

**Figure S1.** Cyclic voltammograms of 1.0 mM **5a** at different scan rates. Curves are obtained at 40, 50, 60, 80, 100, 120, 150, 200, 220, 250, and 280 mV/s, respectively.

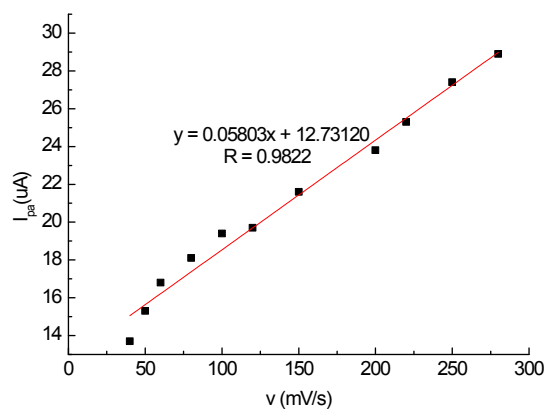

**Figure S2.** The plot of peak current vs. scan rate

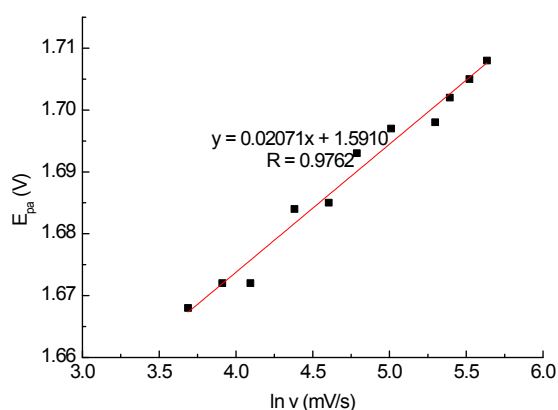

**Figure S3.** The relationship between  $E_{pa}$  and  $\ln v$ .

The peak current increased linearly with the scan rate in the range of 40-400 mV/s and the equation could be expressed as follows:  $y = 0.05803x + 12.7320$ ,  $R = 0.9822$ . It could be seen that the oxidation of compound **5a** was an adsorption-controlled process. For an adsorption-controlled and irreversible electrode process, according to Laviron method,<sup>2</sup>  $E_{pa}$  is defined by

the following equation:

$$E_{pa} = E^0 + (RT/\alpha nF) \ln (RTk^0/\alpha nF) + (RT/\alpha nF) \ln v$$

where  $\alpha$  is transfer coefficient,  $k^0$  is standard rate constant of the reaction,  $n$  is electron transfer number involved in the rate-determining step,  $v$  is scan rate, and  $E^0$  is formal potential. Other symbols have their usual meanings. Thus, the value of  $\alpha n$  can be easily calculated from the slope of  $E_{pa}$ - $\ln v$ . In this system, the slope is 0.02071. Generally, transfer coefficient  $\alpha$  was assumed as 0.5,<sup>3</sup> so the value of the number of electron ( $n$ ) was calculated to be 2.

## 4. Characterization Data

### 5-benzoyl-6-methyl-4-(p-tolyl)pyrimidin-2(1H)-one (4a):

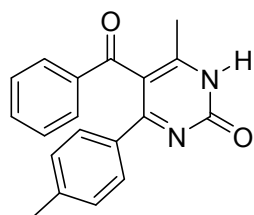

Yellow solid (65.7 mg, 72%). mp. 109.8-112.3 °C. <sup>1</sup>H NMR (400 MHz, CDCl<sub>3</sub>):  $\delta$  13.91 (bs, 1H), 7.70-7.64 (m, 2H), 7.49-7.42 (m, 3H), 7.35-7.28 (m, 2H), 7.03 (d,  $J$  = 8.0 Hz, 2H), 2.45 (s, 3H), 2.23 (s, 3H). <sup>13</sup>C NMR (100 MHz, CDCl<sub>3</sub>):  $\delta$  194.7, 158.8, 141.7, 137.2, 133.8, 129.3, 129.3, 129.0, 128.7, 116.9, 21.4. HRMS (ESI) calcd. for C<sub>19</sub>H<sub>17</sub>N<sub>2</sub>O<sub>2</sub> (M+H)<sup>+</sup>: 305.1285, found: 305.1284.

### 5-benzoyl-6-methyl-4-phenylpyrimidin-2(1H)-one (4b):

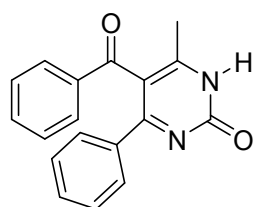

White solid (59.2 mg, 68%). mp. 180.1-183.4 °C. <sup>1</sup>H NMR (400 MHz, CDCl<sub>3</sub>):  $\delta$  13.91 (bs, 1H), 7.68-7.61 (m, 2H), 7.58-7.52 (m, 2H), 7.47-7.39 (m, 1H), 7.33-7.28 (m, 2H), 7.26-7.18 (m, 3H), 2.48 (s, 3H). <sup>13</sup>C NMR (100 MHz, CDCl<sub>3</sub>):  $\delta$  194.4, 158.8, 137.2, 133.8, 131.1, 129.3, 128.9, 128.7, 128.5, 117.1. HRMS (ESI) calcd. for C<sub>18</sub>H<sub>15</sub>N<sub>2</sub>O<sub>2</sub> (M+H)<sup>+</sup>: 291.1128, found: 291.1127.

### 5-benzoyl-4-(4-methoxyphenyl)-6-methylpyrimidin-2(1H)-one (4c):

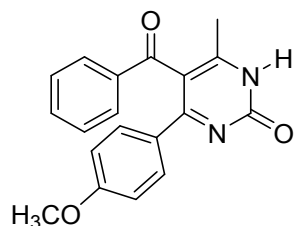

White solid (70.2mg, 73%). mp. 168.9-171.2 °C. <sup>1</sup>H NMR (400 MHz, CDCl<sub>3</sub>): δ 13.86 (bs, 1H), 7.72-7.64 (m, 2H), 7.56 (d, *J* = 8.8 Hz, 2H), 7.48-7.42 (m, 1H), 7.35-7.28 (m, 2H), 6.73 (d, *J* = 8.8 Hz, 2H), 3.72 (s, 3H). <sup>13</sup>C NMR (100 MHz, CDCl<sub>3</sub>): δ 194.9, 162.0, 158.8, 137.2, 133.8, 131.0, 129.3, 128.7, 116.6, 113.9, 55.3. HRMS (ESI) calcd. for C<sub>19</sub>H<sub>17</sub>N<sub>2</sub>O<sub>3</sub> (M+H)<sup>+</sup>: 321.1234, found: 321.1234.

**5-benzoyl-4-(4-fluorophenyl)-6-methylpyrimidin-2(1H)-one (4d):**

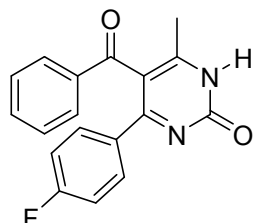

White solid (52.7 mg, 57%). mp. 110.2-113.7 °C. <sup>1</sup>H NMR (400 MHz, CDCl<sub>3</sub>): δ 14.00 (bs, 1H), 7.68-7.63 (m, 2H), 7.61-7.55 (m, 2H), 7.50-7.44 (m, 1H), 7.36-7.30 (m, 2H), 6.91 (t, *J* = 8.6 Hz, 2H), 2.49 (s, 3H). <sup>13</sup>C NMR (100 MHz, CDCl<sub>3</sub>): δ 194.3, 164.3 (d, *J* = 253.1 Hz), 158.7, 137.1, 134.0, 131.3 (d, *J* = 8.8 Hz), 129.3, 128.8, 117.0, 115.7 (d, *J* = 22.0 Hz). <sup>19</sup>F NMR (376 MHz, CDCl<sub>3</sub>): δ -108.1. HRMS (ESI) calcd. for C<sub>18</sub>H<sub>14</sub>FN<sub>2</sub>O<sub>2</sub> (M+H)<sup>+</sup>: 309.1034, found: 309.1035.

**5-benzoyl-4-(4-bromophenyl)-6-methylpyrimidin-2(1H)-one (4e):**

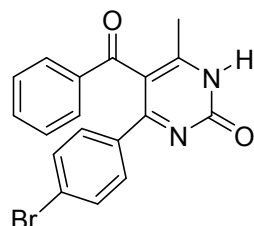

Yellow solid (56.5mg, 51%). mp. 174.2-176.8 °C. <sup>1</sup>H NMR (400 MHz, CDCl<sub>3</sub>): δ 13.98 (bs, 1H), 7.70-7.63 (m, 2H), 7.50 (t, *J* = 7.5 Hz, 1H), 7.46-7.40 (m, 2H), 7.39-7.31 (m, 4H), 2.47 (s, 3H). <sup>13</sup>C NMR (100 MHz, CDCl<sub>3</sub>): δ 194.2, 158.7, 137.0, 134.2, 131.7, 130.5, 129.3, 128.9, 126.1, 117.0. HRMS (ESI) calcd. for C<sub>18</sub>H<sub>14</sub>BrN<sub>2</sub>O<sub>2</sub> (M+H)<sup>+</sup>: 369.0233, found: 370.0265.

**5-benzoyl-6-methyl-4-(4-nitrophenyl)pyrimidin-2(1H)-one (4f):**

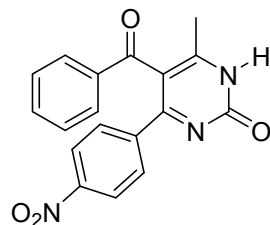

Yellow solid (12.1 mg, 12%). mp. 117.4-119.2 °C. <sup>1</sup>H NMR (400 MHz, CDCl<sub>3</sub>): δ 13.81 (bs, 1H), 8.11-8.05 (m, 2H), 7.75-7.70 (m, 2H), 7.70-7.64 (m, 2H), 7.51 (t, *J* = 7.5 Hz, 1H), 7.39-7.34 (m, 2H), 2.52 (s, 3H). <sup>13</sup>C NMR (100 MHz, CDCl<sub>3</sub>): δ 193.5, 158.5, 149.0, 136.9, 134.5, 129.9, 129.3, 129.1, 123.5, 117.3. HRMS (ESI) calcd. for C<sub>18</sub>H<sub>14</sub>N<sub>3</sub>O<sub>4</sub> (M+H)<sup>+</sup>: 336.0979, found: 336.0979.

**5-benzoyl-4-(2-chlorophenyl)-6-methylpyrimidin-2(1H)-one (4g):**

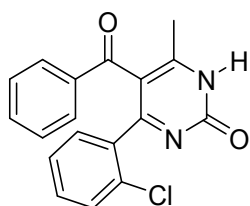

Yellow solid (37.0 mg, 38%). mp. 138.4-140.3 °C. <sup>1</sup>H NMR (400 MHz, CDCl<sub>3</sub>): δ 7.67-7.60 (m, 2H), 7.47-7.40 (m, 1H), 7.35-7.28 (m, 2H), 7.24-7.17 (m, 1H), 7.16-7.05 (m, 3H), 2.49 (s, 3H). <sup>13</sup>C NMR (100 MHz, CDCl<sub>3</sub>): δ 193.2, 158.0, 137.4, 133.7, 131.8, 131.2, 130.4, 129.9, 129.1, 128.5, 126.5, 118.4. HRMS (ESI) calcd. for C<sub>18</sub>H<sub>14</sub>ClN<sub>2</sub>O<sub>2</sub> (M+H)<sup>+</sup>: 325.0738, found: 325.0740.

**6-methyl-5-(4-methylbenzoyl)-4-(p-tolyl)pyrimidin-2(1H)-one (4i):**

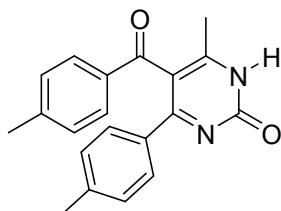

White solid (40.1 mg, 42%). mp. 173.4-176.8 °C. <sup>1</sup>H NMR (400 MHz, CDCl<sub>3</sub>): δ 13.85 (bs, 1H), 7.60 (d, *J* = 8.0 Hz, 2H), 7.48 (d, *J* = 7.8 Hz, 2H), 7.13 (d, *J* = 7.8 Hz, 2H), 7.04 (d, *J* = 7.7 Hz, 2H), 2.41 (s, 3H), 2.34 (s, 3H), 2.25 (s, 3H). <sup>13</sup>C NMR (100 MHz, CDCl<sub>3</sub>): δ 194.3, 158.9, 145.0, 141.7, 134.8, 129.6, 129.5, 129.3, 129.0, 117.1, 21.8, 21.4. HRMS (ESI) calcd. for C<sub>20</sub>H<sub>19</sub>N<sub>2</sub>O<sub>2</sub> (M+H)<sup>+</sup>: 319.1441, found: 319.1445.

**5-(4-methoxybenzoyl)-6-methyl-4-(p-tolyl)pyrimidin-2(1H)-one (4j):**

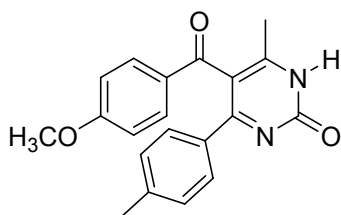

Yellow solid (32.1 mg, 32%). mp. 114.6-117.6 °C. <sup>1</sup>H NMR (400 MHz, CDCl<sub>3</sub>): δ 13.86 (bs, 1H), 7.47 (d, *J* = 8.1 Hz, 2H), 7.28-7.25 (m, 1H), 7.22-7.18 (m, 2H), 7.05 (d, *J* = 8.0 Hz, 2H), 7.03-6.98 (m, 1H), 3.79 (s, 3H), 2.44 (s, 3H), 2.25 (s, 3H). <sup>13</sup>C NMR (100 MHz, CDCl<sub>3</sub>): δ 193.1, 164.1, 158.8, 141.7, 131.9, 130.3, 129.3, 128.9, 117.2, 114.0, 63.8, 55.5, 21.4. HRMS (ESI) calcd. for C<sub>20</sub>H<sub>19</sub>N<sub>2</sub>O<sub>3</sub> (M+H)<sup>+</sup>: 335.1390, found: 335.1391.

**5-(4-fluorobenzoyl)-6-methyl-4-(p-tolyl)pyrimidin-2(1H)-one (4k):**

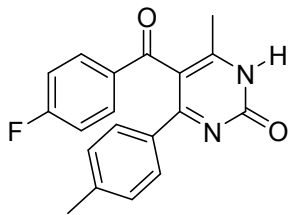

Yellow solid (71.6 mg, 74%). mp. 168.5-170.0 °C. <sup>1</sup>H NMR (400 MHz, CDCl<sub>3</sub>): δ 13.81 (bs, 1H), 7.68 (dt, *J*<sub>1</sub> = 5.4 Hz, *J*<sub>2</sub> = 8.8 Hz, 2H), 7.45 (d, *J* = 8.0 Hz, 2H), 7.04 (d, *J* = 8.0 Hz, 2H), 7.00-6.93 (m, 2H), 2.46 (s, 3H), 2.25 (s, 3H). <sup>13</sup>C NMR (100 MHz, CDCl<sub>3</sub>): δ 193.0, 165.9 (d, *J* = 256.8 Hz), 158.7, 114.94, 133.7 (d, *J* = 2.9 Hz), 132.0 (d, *J* = 9.5 Hz), 129.3, 128.9, 116.5, 115.9 (d, *J* = 22.0 Hz), 21.4. <sup>19</sup>F NMR (376 MHz, CDCl<sub>3</sub>): δ -103.2. HRMS (ESI) calcd. for C<sub>19</sub>H<sub>16</sub>FN<sub>2</sub>O<sub>2</sub> (M+H)<sup>+</sup>: 323.1190, found: 323.1192.

**5-(4-bromobenzoyl)-6-methyl-4-(p-tolyl)pyrimidin-2(1H)-one (4l):**

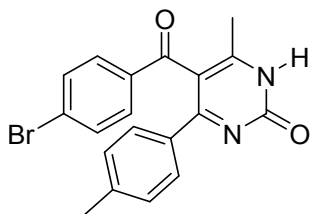

White solid (63.2 mg, 55%). mp. 204.6-207.4 °C. <sup>1</sup>H NMR (400 MHz, CDCl<sub>3</sub>): δ 13.81 (bs, 1H), 7.54-7.48 (m, 2H), 7.47-7.40 (m, 4H), 7.05 (d, *J* = 7.8 Hz, 2H), 2.45 (s, 3H), 2.26 (s, 3H). <sup>13</sup>C NMR (100 MHz, CDCl<sub>3</sub>): δ 193.6, 158.7, 142.1, 136.0, 132.0, 130.7, 129.4, 129.1, 128.9, 116.3, 21.4. HRMS (ESI) calcd. for C<sub>19</sub>H<sub>16</sub>BrN<sub>2</sub>O<sub>2</sub> (M+H)<sup>+</sup>: 383.0390, found: 383.0389.

**6-methyl-4-(p-tolyl)-5-(4-(trifluoromethyl)benzoyl)pyrimidin-2(1H)-one (4m):**

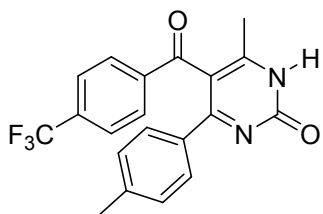

Yellow solid (52.5 mg, 47%). mp. 181.5-184.3 °C. <sup>1</sup>H NMR (400 MHz, CDCl<sub>3</sub>): δ 13.86 (bs, 1H), 7.72 (d, *J* = 8.1 Hz, 2H), 7.53 (d, *J* = 8.3 Hz, 2H), 7.41 (d, *J* = 8.1 Hz, 2H), 7.02 (d, *J* = 7.8 Hz, 2H), 2.50 (s, 3H), 2.23 (s, 3H). <sup>13</sup>C NMR (100 MHz, CDCl<sub>3</sub>): δ 193.5, 158.6, 142.2, 140.0, 134.6 (q, *J* = 33.0 Hz), 129.5, 129.0, 125.6 (q, *J* = 3.7 Hz), 128.3 (d, *J* = 272.9 Hz), 127.4, 116.2, 21.3. <sup>19</sup>F NMR (376 MHz, CDCl<sub>3</sub>): δ -63.3. HRMS (ESI) calcd. for C<sub>20</sub>H<sub>16</sub>F<sub>3</sub>N<sub>2</sub>O<sub>2</sub> (M+H)<sup>+</sup>: 373.1158, found: 373.1160.

**5-(3,4-difluorobenzoyl)-6-methyl-4-(p-tolyl)pyrimidin-2(1H)-one (4n):**

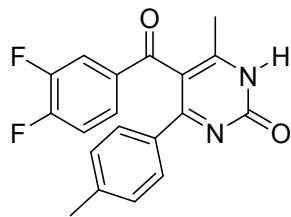

White solid (48.0 mg, 47%). mp. 182.4-184.3 °C. <sup>1</sup>H NMR (400 MHz, CDCl<sub>3</sub>): δ 13.87 (bs, 1H), 7.57-7.49 (m, 1H), 7.43 (d, *J* = 8.0 Hz, 2H), 7.37-7.31 (m, 1H), 7.10-6.99 (m, 3H), 2.48 (s, 3H), 2.27 (s, 3H). <sup>13</sup>C NMR (100 MHz, CDCl<sub>3</sub>): δ 192.1, 158.6, 153.8 (dd, *J*<sub>1</sub> = 13.2 Hz, *J*<sub>2</sub> = 259.0 Hz), 150.3 (dd, *J*<sub>1</sub> = 13.2 Hz, *J*<sub>2</sub> = 251.6 Hz), 142.2, 134.4, 129.5, 128.9, 126.5 (q, *J* = 2.9 Hz), 118.2 (d, *J* = 18.3 Hz), 117.5 (d, *J* = 18.3 Hz), 115.9, 21.4. <sup>19</sup>F NMR (376 MHz, CDCl<sub>3</sub>): δ -127.8 (d, *J* = 17.7 Hz), -135.2 (d, *J* = 21.8 Hz). HRMS (ESI) calcd. for C<sub>19</sub>H<sub>15</sub>F<sub>2</sub>N<sub>2</sub>O<sub>2</sub> (M+H)<sup>+</sup>: 341.1096, found: 341.1098.

**6-methyl-5-(3-methylbenzoyl)-4-(p-tolyl)pyrimidin-2(1H)-one (4o):**

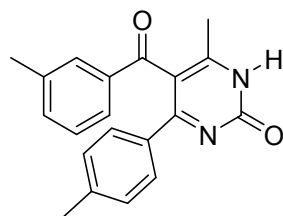

White solid (52.5 mg, 55%). mp. 71.6-73.8 °C. <sup>1</sup>H NMR (400 MHz, CDCl<sub>3</sub>): δ 13.92 (bs, 1H), 7.52-7.42 (m, 4H), 7.30-7.25 (m, 1H), 7.24-7.17 (m, 1H), 7.04 (d, *J* = 8.0 Hz, 2H), 2.43 (s, 3H), 2.30 (s, 3H), 2.25 (s, 3H). <sup>13</sup>C NMR (100 MHz, CDCl<sub>3</sub>): δ 194.8, 158.9, 141.7, 138.6, 137.2, 134.7, 129.8, 129.2, 128.9, 128.6, 126.7, 117.1, 21.4, 21.2. HRMS (ESI) calcd. for C<sub>20</sub>H<sub>19</sub>N<sub>2</sub>O<sub>2</sub> (M+H)<sup>+</sup>: 319.1441, found: 319.1442.

**5-(3-methoxybenzoyl)-6-methyl-4-(p-tolyl)pyrimidin-2(1H)-one (4p):**

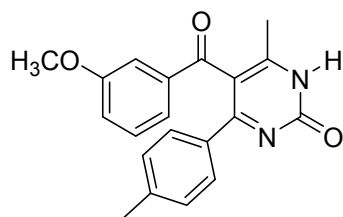

Yellow solid (45.1 mg, 45%). mp. 102.4-103.5 °C. <sup>1</sup>H NMR (400 MHz, CDCl<sub>3</sub>): δ 13.83 (bs, 1H), 7.47 (d, *J* = 8.1 Hz, 2H), 7.28-7.25 (m, 1H), 7.22-7.17 (m, 2H), 7.05 (d, *J* = 8.0 Hz, 2H), 7.02-6.98 (m, 1H), 3.79 (s, 3H), 2.44 (s, 3H), 2.25 (s, 3H). <sup>13</sup>C NMR (100 MHz, CDCl<sub>3</sub>): δ 194.4, 159.8, 158.8, 141.7, 138.6, 129.7, 129.3, 129.0, 122.4, 120.6, 117.0, 112.9, 55.5, 21.4. HRMS (ESI) calcd. for C<sub>20</sub>H<sub>19</sub>N<sub>2</sub>O<sub>3</sub> (M+H)<sup>+</sup>: 335.1390, found: 335.1392.

**5-(3-bromobenzoyl)-6-methyl-4-(p-tolyl)pyrimidin-2(1H)-one (4q):**



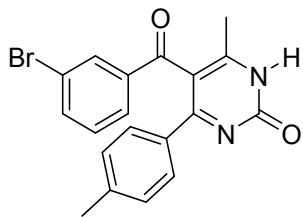

Yellow solid (57.5 mg, 50%). mp. 102.5-103.4 °C. <sup>1</sup>H NMR (400 MHz, CDCl<sub>3</sub>): δ 13.87 (bs, 1H), 7.79-7.75 (m, 1H), 7.56-7.50 (m, 2H), 7.43 (d, *J* = 8.1 Hz, 2H), 7.19-7.12 (m, 1H), 7.05 (d, *J* = 8.0 Hz, 2H), 2.49 (s, 3H), 2.26 (s, 3H). <sup>13</sup>C NMR (100 MHz, CDCl<sub>3</sub>): δ 193.1, 158.7, 142.0, 139.0, 136.4, 132.1, 130.2, 129.4, 128.9, 127.8, 122.9, 116.2, 21.4. HRMS (ESI) calcd. for C<sub>19</sub>H<sub>16</sub>BrN<sub>2</sub>O<sub>2</sub> (M+H)<sup>+</sup>: 383.0390, found: 383.0388.

**6-methyl-5-(2-methylbenzoyl)-4-(p-tolyl)pyrimidin-2(1H)-one (4r):**

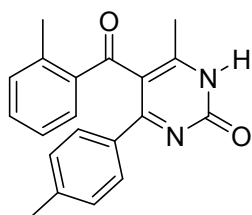

White solid (54.4 mg, 57%). mp. 192.4-195.3 °C. <sup>1</sup>H NMR (400 MHz, CDCl<sub>3</sub>): δ 13.81 (bs, 1H), 7.38 (d, *J* = 8.1 Hz, 2H), 7.28-7.21 (m, 2H), 7.09 (d, *J* = 7.5 Hz, 1H), 7.06-6.98 (m, 3H), 2.55-2.45 (m, 6H), 2.24 (s, 3H). <sup>13</sup>C NMR (100 MHz, CDCl<sub>3</sub>): δ 196.0, 158.9, 141.4, 139.9, 137.2, 132.4, 132.1, 130.6, 129.0, 128.6, 125.6, 118.5, 21.4, 21.3. HRMS (ESI) calcd. for C<sub>20</sub>H<sub>19</sub>N<sub>2</sub>O<sub>2</sub> (M+H)<sup>+</sup>: 319.1441, found: 319.1443.

**5-(2-chlorobenzoyl)-6-methyl-4-(p-tolyl)pyrimidin-2(1H)-one (4s):**

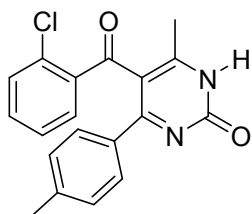

White solid (65.0 mg, 64%). mp. 110.3-113.7 °C. <sup>1</sup>H NMR (400 MHz, CDCl<sub>3</sub>): δ 13.71 (bs, 1H), 7.36-7.28 (m, 3H), 7.21-7.11 (m, 2H), 7.09-7.03 (m, 1H), 7.03-6.97 (d, *J* = 8.0 Hz, 2H), 2.62 (s, 3H), 2.23 (s, 3H). <sup>13</sup>C NMR (100 MHz, CDCl<sub>3</sub>): δ 192.9, 158.1, 141.6, 137.4, 132.7, 132.6, 131.5, 130.7, 129.1, 128.8, 126.5, 118.0, 21.3. HRMS (ESI) calcd. for C<sub>19</sub>H<sub>16</sub>ClN<sub>2</sub>O<sub>2</sub> (M+H)<sup>+</sup>: 339.0895, found: 339.0894.

**6-ethyl-5-propionyl-4-(p-tolyl)pyrimidin-2(1H)-one (4t):**

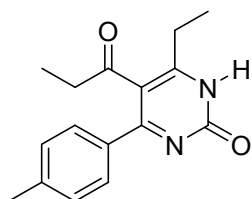

Yellow solid (26.8 mg, 33%). mp. 125.7-128.5 °C. <sup>1</sup>H NMR (400 MHz, CDCl<sub>3</sub>): δ 13.57 (bs,

1H), 7.52 (d,  $J = 7.8$  Hz, 2H), 7.30-7.23 (m, 2H), 2.73 (q,  $J = 7.6$  Hz, 2H), 2.41 (s, 3H), 2.16 (q,  $J = 7.2$  Hz, 2H), 1.36 (t,  $J = 7.5$  Hz, 3H), 0.90 (t,  $J = 7.1$  Hz, 3H).  $^{13}\text{C}$  NMR (100 MHz,  $\text{CDCl}_3$ ):  $\delta$  205.0, 158.7, 142.2, 129.7, 128.8, 118.7, 38.2, 21.5, 8.5. HRMS (ESI) calcd. for  $\text{C}_{16}\text{H}_{19}\text{N}_2\text{O}_2$  ( $\text{M}+\text{H}$ ) $^+$ : 271.1441, found: 271.1443.

**Methyl 6-methyl-2-oxo-4-(p-tolyl)-1,2-dihydropyrimidine-5-carboxylate (4v)<sup>4</sup>:**

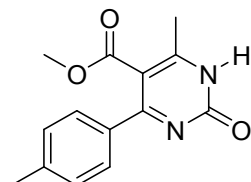

Yellow solid (51.1 mg, 66%). mp. 149.6-152.3 °C.  $^1\text{H}$  NMR (400 MHz,  $\text{CDCl}_3$ ):  $\delta$  13.66 (bs, 1H), 7.52 (d,  $J = 8.0$  Hz, 2H), 7.24 (d,  $J = 8.0$  Hz, 2H), 3.62 (s, 3H), 2.59 (s, 3H), 2.40 (s, 3H).  $^{13}\text{C}$  NMR (100 MHz,  $\text{CDCl}_3$ ):  $\delta$  167.0, 158.4, 141.6, 129.2, 128.1, 111.0, 52.4, 21.5. HRMS (ESI) calcd. for  $\text{C}_{14}\text{H}_{15}\text{N}_2\text{O}_3$  ( $\text{M}+\text{H}$ ) $^+$ : 259.1077, found: 259.1079.

**Ethyl 6-methyl-2-oxo-4-(p-tolyl)-1,2-dihydropyrimidine-5-carboxylate (4w)<sup>5,6</sup>:**

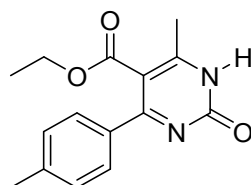

Yellow solid (44.9 mg, 55%). mp. 125.4-128.3 °C.  $^1\text{H}$  NMR (400 MHz,  $\text{CDCl}_3$ ):  $\delta$  13.73 (bs, 1H), 7.51 (d,  $J = 8.0$  Hz, 2H), 7.24 (d,  $J = 8.0$  Hz, 2H), 4.10 (q,  $J = 7.1$  Hz, 2H), 2.59 (s, 3H), 2.40 (s, 3H), 1.00 (t,  $J = 7.1$  Hz, 3H).  $^{13}\text{C}$  NMR (100 MHz,  $\text{CDCl}_3$ ):  $\delta$  166.4, 158.4, 141.5, 129.1, 128.2, 111.4, 61.6, 21.5, 13.6. HRMS (ESI) calcd. for  $\text{C}_{15}\text{H}_{17}\text{N}_2\text{O}_3$  ( $\text{M}+\text{H}$ ) $^+$ : 273.1234, found: 273.1233.

**Benzyl 6-methyl-2-oxo-4-(p-tolyl)-1,2-dihydropyrimidine-5-carboxylate (4x):**

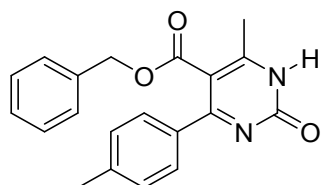

White solid (76.2 mg, 76%). mp. 70.1-73.2 °C.  $^1\text{H}$  NMR (400 MHz,  $\text{CDCl}_3$ ):  $\delta$  13.70 (bs, 1H), 7.47 (d,  $J = 7.8$  Hz, 2H), 7.31-7.20 (m, 3H), 7.14 (d,  $J = 8.0$  Hz, 2H), 6.96-6.90 (m, 2H), 5.04 (s, 2H), 2.57 (s, 3H), 2.36 (s, 3H).  $^{13}\text{C}$  NMR (100 MHz,  $\text{CDCl}_3$ ):  $\delta$  166.2, 157.3, 141.6, 134.3, 129.3, 128.5, 128.4, 128.4, 127.9, 110.8, 67.6, 21.4. HRMS (ESI) calcd. for  $\text{C}_{20}\text{H}_{19}\text{N}_2\text{O}_3$  ( $\text{M}+\text{H}$ ) $^+$ : 335.1390, found: 335.1392.

**Methyl 6-ethyl-2-oxo-4-(p-tolyl)-1,2-dihydropyrimidine-5-carboxylate (4y):**

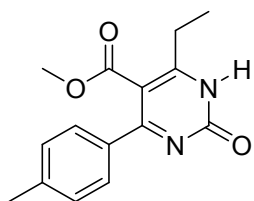

Yellow solid (28.6 mg, 35%). mp. 141.3-144.6 °C. <sup>1</sup>H NMR (400 MHz, CDCl<sub>3</sub>): δ 13.58 (bs, 1H), 7.52 (d, *J* = 8.0 Hz, 2H), 7.24 (d, *J* = 8.0 Hz, 2H), 3.62 (s, 3H), 2.86 (q, *J* = 7.6 Hz, 2H), 2.40 (s, 3H), 1.38 (t, *J* = 7.5 Hz, 3H). <sup>13</sup>C NMR (100 MHz, CDCl<sub>3</sub>): δ 167.1, 158.6, 141.6, 129.3, 128.1, 110.6, 52.4, 21.5, 13.4. HRMS (ESI) calcd. for C<sub>15</sub>H<sub>17</sub>N<sub>2</sub>O<sub>3</sub> (M+H)<sup>+</sup>: 273.1234, found: 273.1235.

**Ethyl 2-oxo-6-phenyl-4-(p-tolyl)-1,2-dihydropyrimidine-5-carboxylate (4z)<sup>6</sup>:**

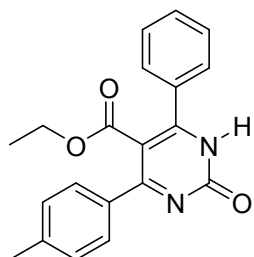

Yellow solid (34.1 mg, 34%). mp, 98.3-100.2 °C. <sup>1</sup>H NMR (400 MHz, CDCl<sub>3</sub>): δ 13.15 (bs, 1H), 7.64-7.58 (m, 2H), 7.53 (d, *J* = 8.2 Hz, 2H), 7.50-7.41 (m, 3H), 7.30-7.24 (m, 2H), 3.93 (q, *J* = 7.1 Hz, 2H), 2.40 (s, 3H), 0.87 (t, *J* = 7.1 Hz, 3H). <sup>13</sup>C NMR (100 MHz, CDCl<sub>3</sub>): δ 166.5, 157.9, 141.8, 131.0, 129.5, 128.6, 128.1, 128.0, 111.8, 61.8, 21.5, 13.4. <sup>1</sup>H NMR (400 MHz, DMSO-*d*<sub>6</sub>): δ 12.53 (bs, 1H), 7.59-7.40 (m, 7H), 7.32-7.28 (m, 2H), 3.85 (q, *J* = 7.1 Hz, 2H), 2.37 (s, 3H), 0.76 (t, *J* = 7.1 Hz, 3H). <sup>13</sup>C NMR (100 MHz, DMSO-*d*<sub>6</sub>): δ 166.9, 141.0, 130.9, 129.5, 128.9, 128.4, 128.2, 61.6, 21.4, 13.6. HRMS (ESI) calcd. for C<sub>20</sub>H<sub>19</sub>N<sub>2</sub>O<sub>3</sub> (M+H)<sup>+</sup>: 335.1390, found: 335.1391.

References:

- [1] F. Berti, S. Bincoletto, I. Donati, G. Fontanive, M. Fregonese and F. Benedetti, *Org. Biomol. Chem.*, 2011, **9**, 1987.
- [2] E. Laviron, *J. Electroanal. Chem. Interfacial.*, 1974, **52**, 355.
- [3] L. Cui, L. Li, S. Ai, H. Yin, P. Ju and T. Liu, *J. Solid State Electrochem.*, 2011, **15**, 1253.
- [4] K. Yamamoto, Y. G. Chen and F. G. Buono, *Org. Lett.*, 2005, **7**, 4673.
- [5] X.-C. Wang, G.-J. Yang, Z.-J. Quan, P.-Y. Ji, J.-L. Liang and R.-G. Ren, *Synlett.*, 2010, **11**, 1657.
- [6] Q. Liu, Y.-N. Li, H.-H. Zhang, B. Chen, C.-H. Tung and L.-Z. Wu, *J. Org. Chem.*, 2011, **76**, 1444.

## 5. $^1\text{H}$ , $^{13}\text{C}$ and $^{19}\text{F}$ NMR Spectra

14840-K240-1-H.ESP  
14840-K240-1-H.ESP

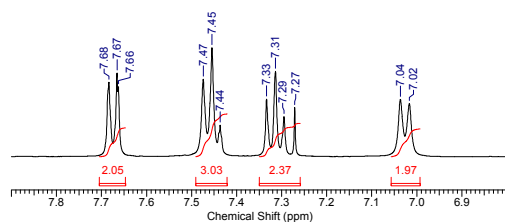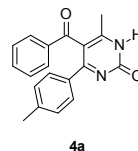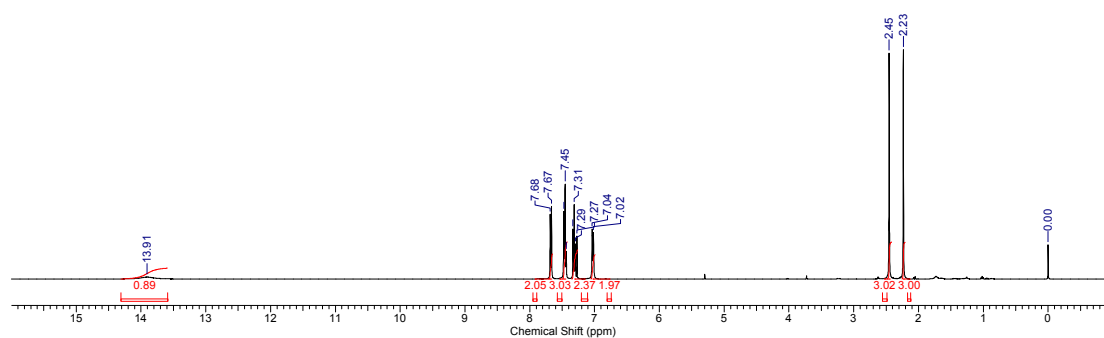

Figure S4.  $^1\text{H}$  NMR spectrum of compound 4a

8621-K133-C.ESP

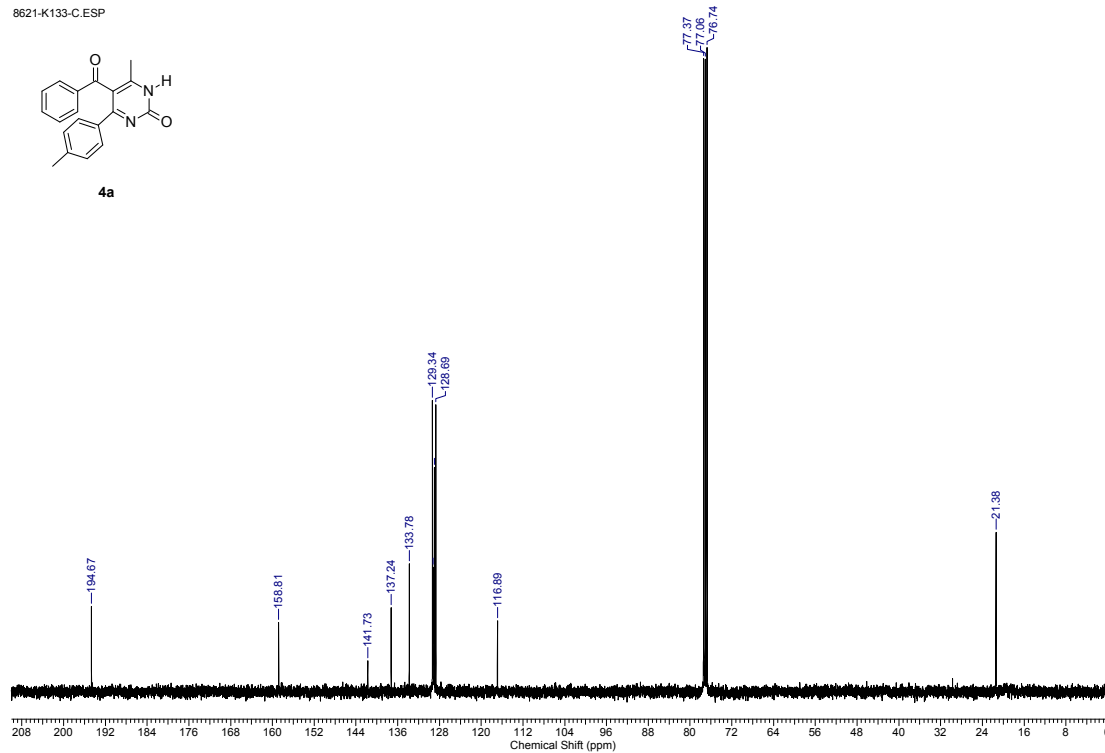

Figure S5.  $^{13}\text{C}$  NMR spectrum of compound 4a

9840-K175-4-H.ESP  
9840-K175-4-H.ESP

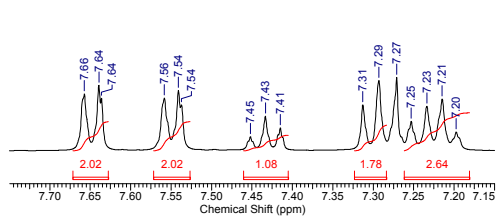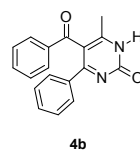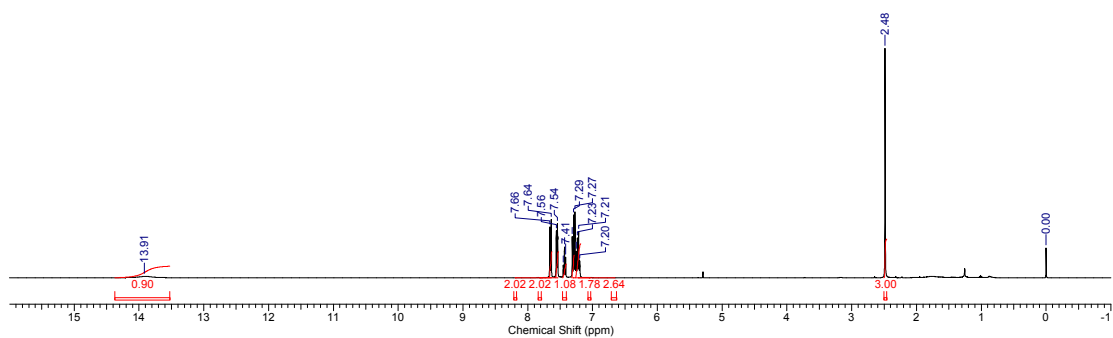

Figure S6. <sup>1</sup>H NMR spectrum of compound 4b

9841-K175-4-C.ESP

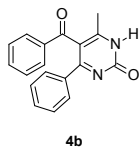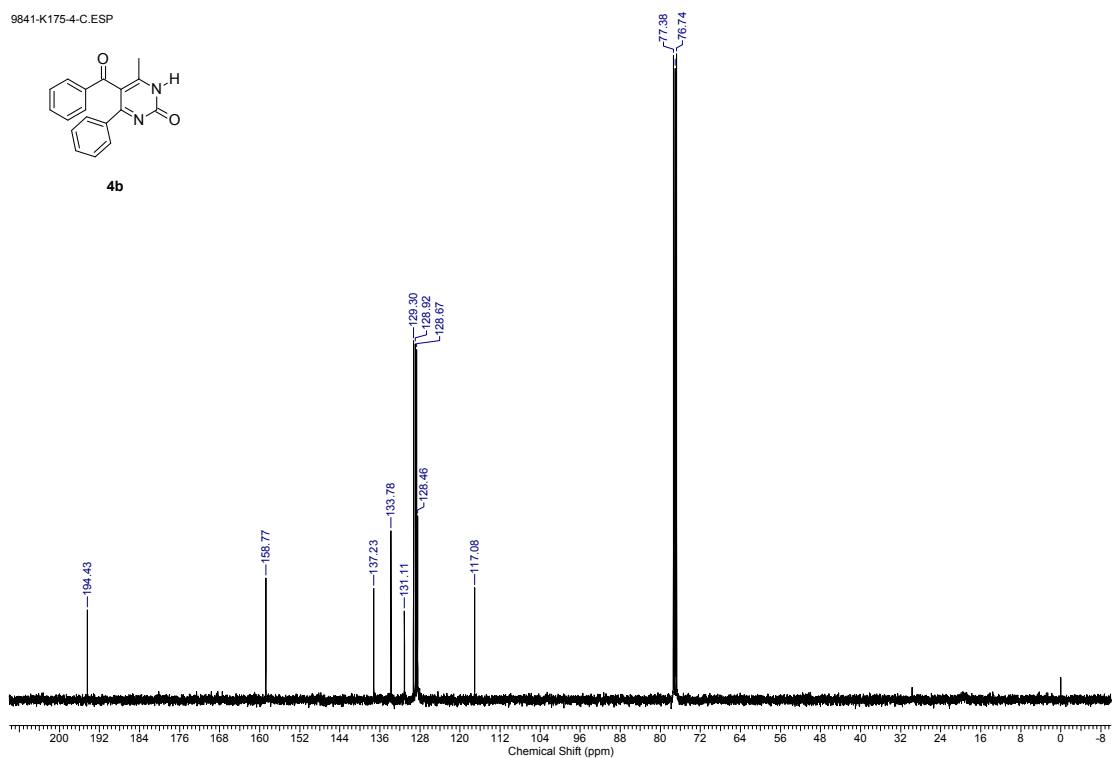

Figure S7. <sup>13</sup>C NMR spectrum of compound 4b

10490-K176-H.ESP  
10490-K176-H.ESP

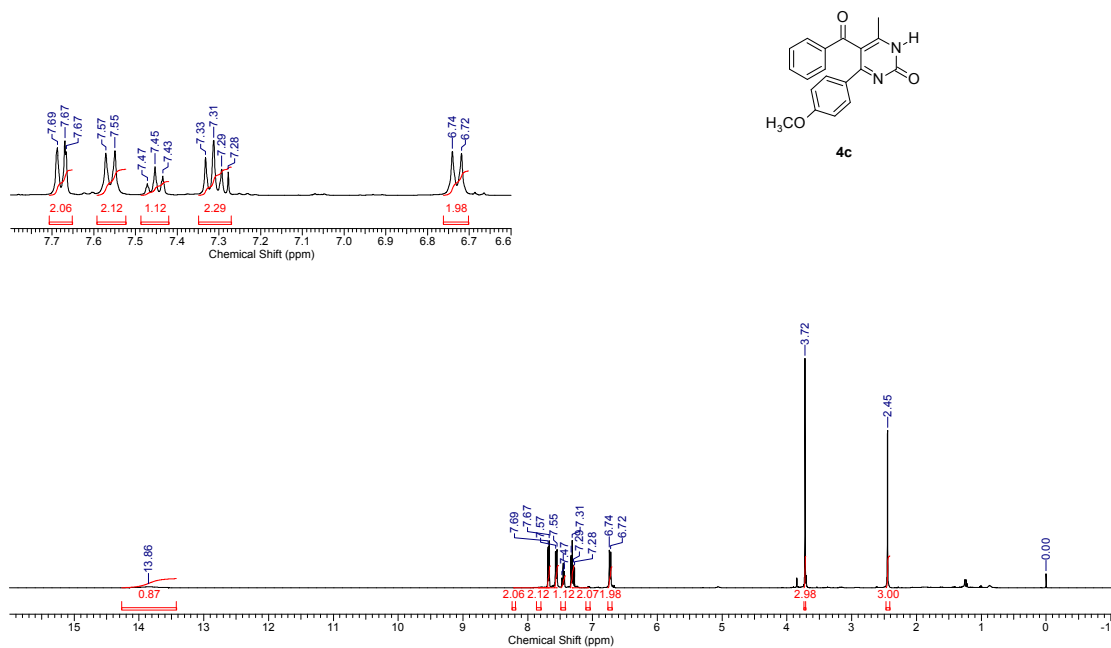

Figure S8. <sup>1</sup>H NMR spectrum of compound 4c

10491-K176-C.ESP

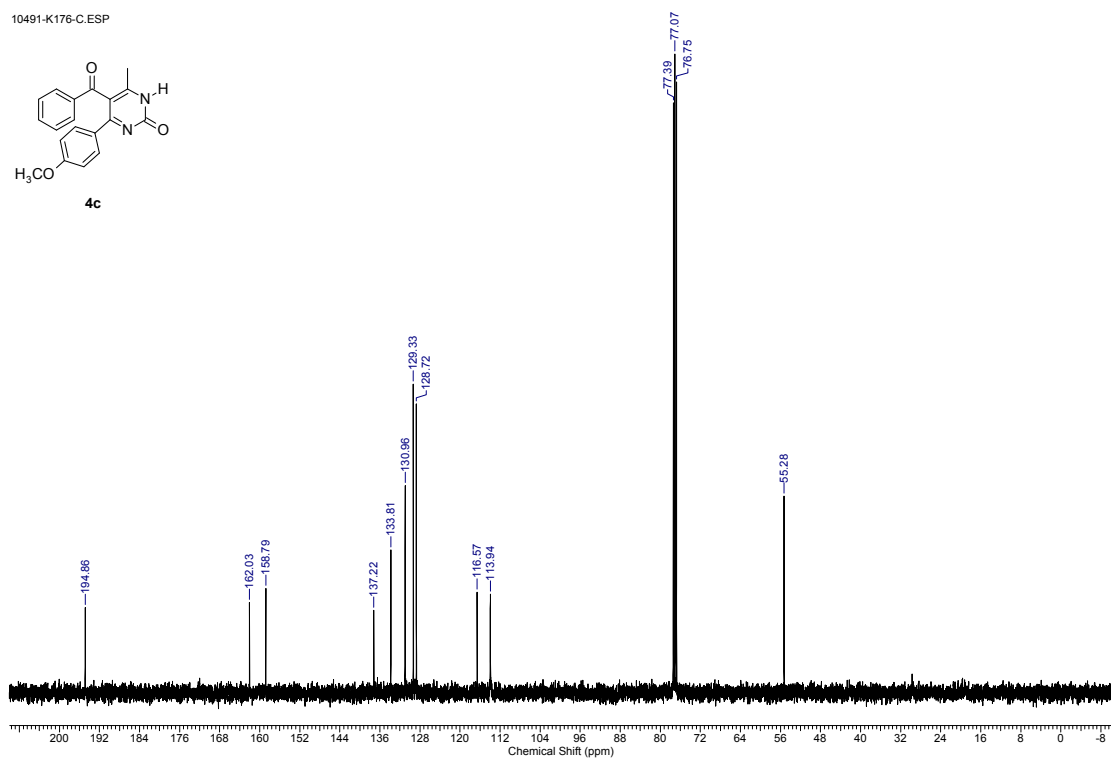

Figure S9. <sup>13</sup>C NMR spectrum of compound 4c

10543-K182-H.ESP  
10543-K182-H.ESP

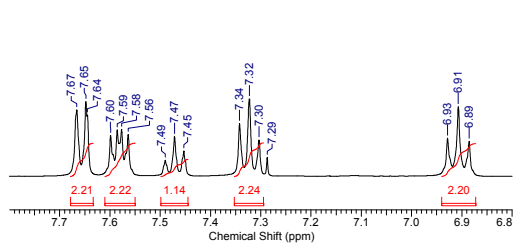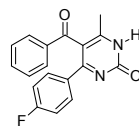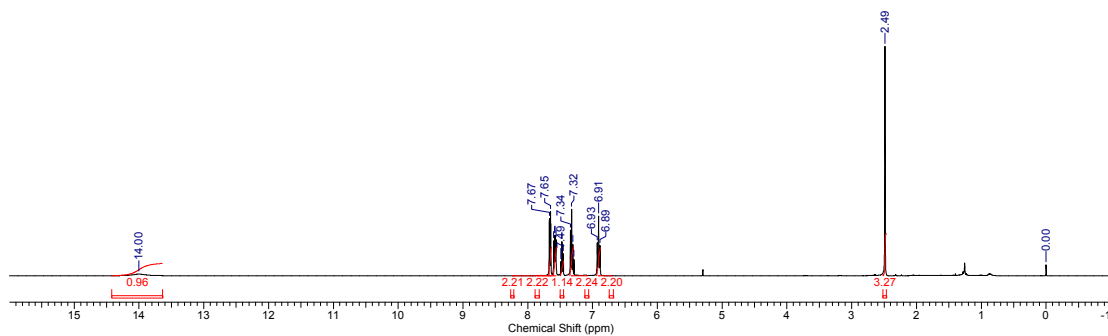

Figure S10. <sup>1</sup>H NMR spectrum of compound 4d

10541-K182-C.ESP

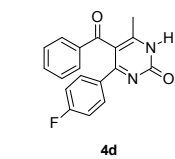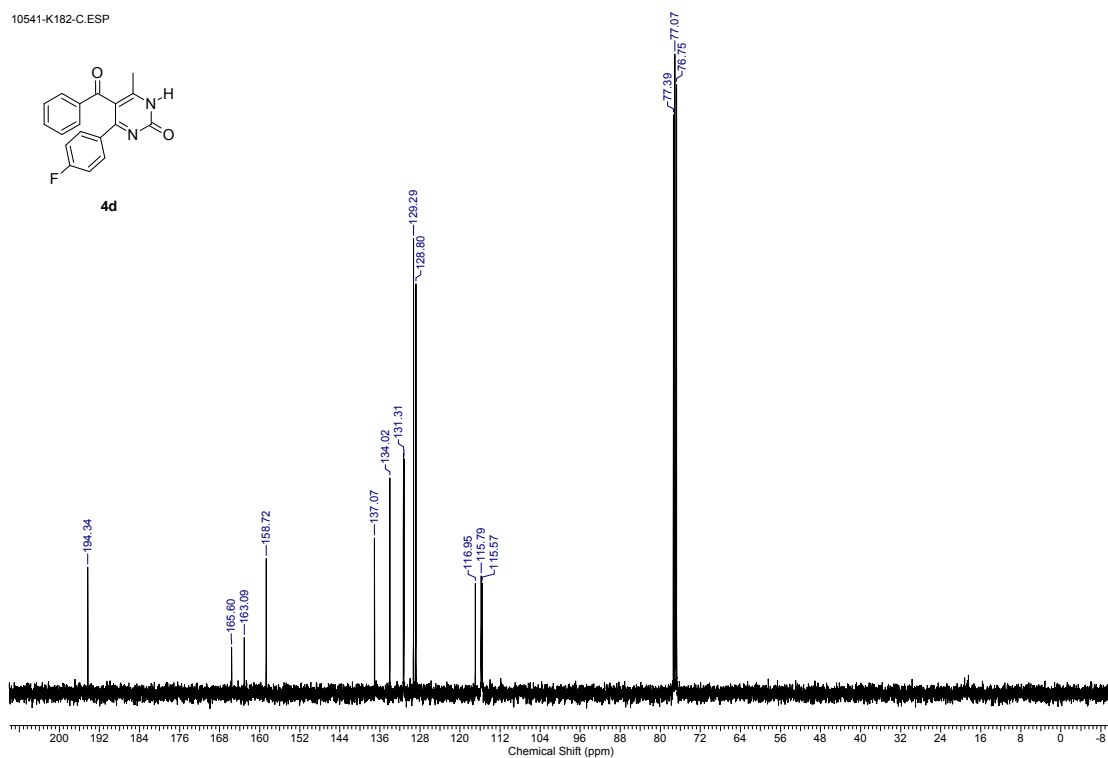

Figure S11. <sup>13</sup>C NMR spectrum of compound 4d

10542-K182-F.ESP

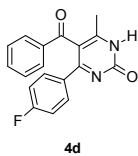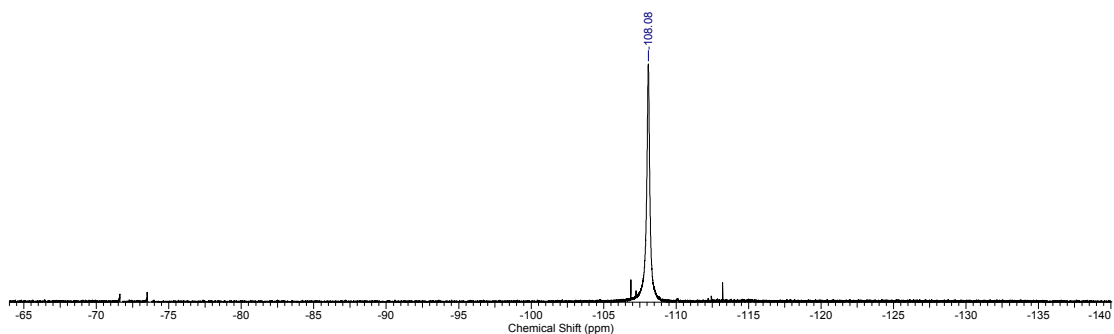

Figure S12.  $^{19}\text{F}$  NMR spectrum of compound 4d

10550-K183-3-H.ESP  
10550-K183-3-H.ESP

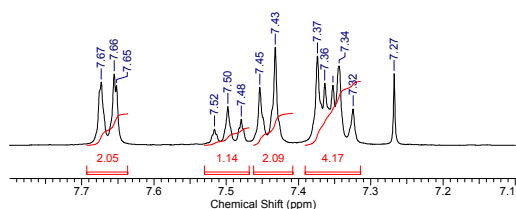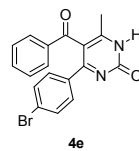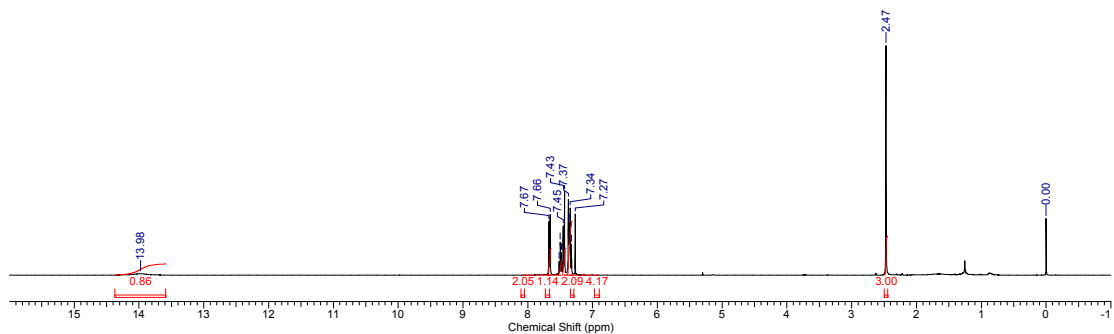

Figure S13.  $^1\text{H}$  NMR spectrum of compound 4e



10551-K183-3-C.ESP

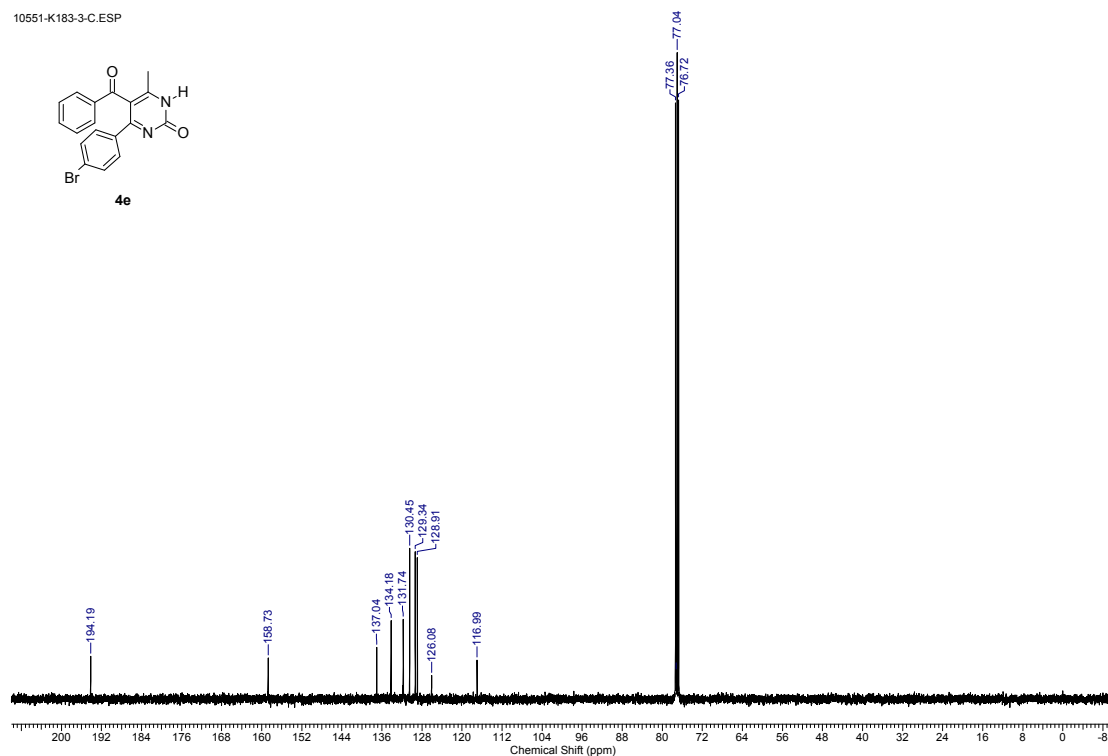

Figure S14. <sup>13</sup>C NMR spectrum of compound **4e**

1940-K241-6-H.ESP  
1940-K241-6-H.ESP

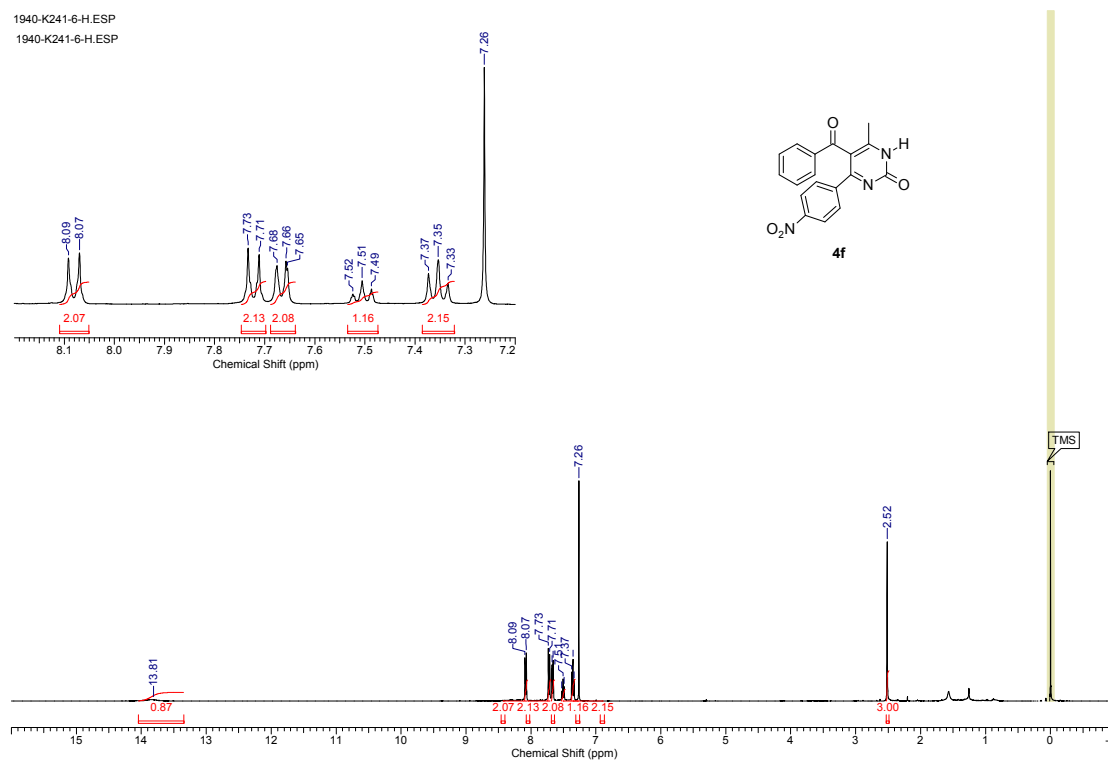

Figure S15. <sup>1</sup>H NMR spectrum of compound **4f**

1511-K241-2-C.ESP

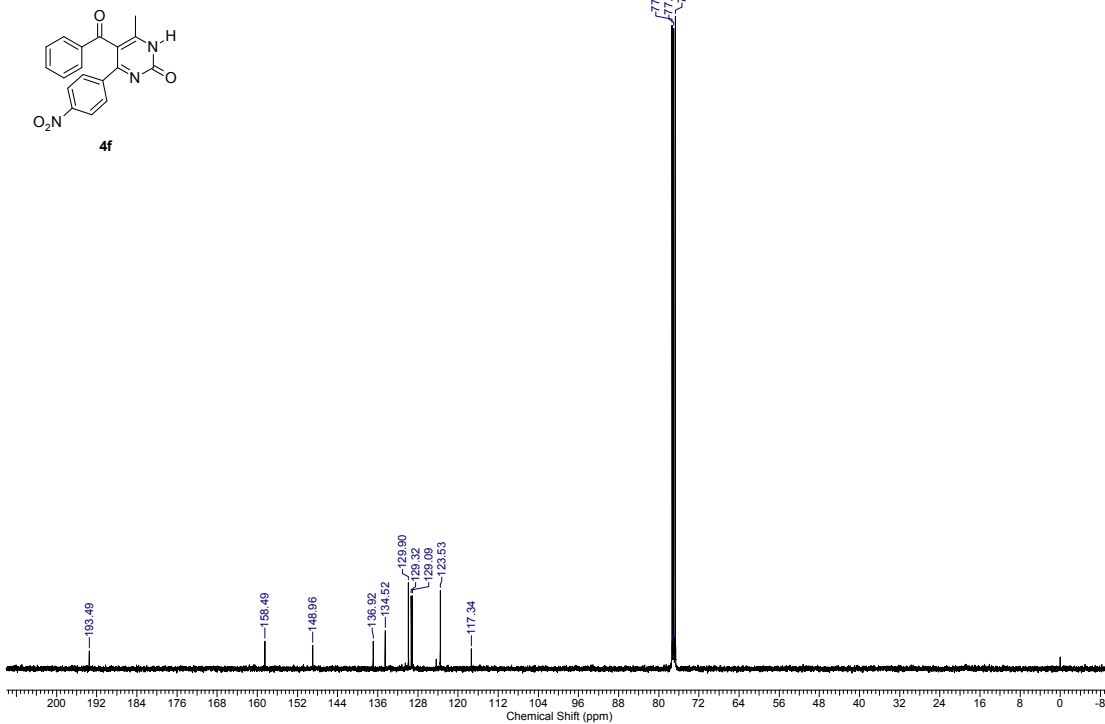

Figure S16. <sup>13</sup>C NMR spectrum of compound 4f

1620-K242-1-H.ESP

1620-K242-1-H.ESP

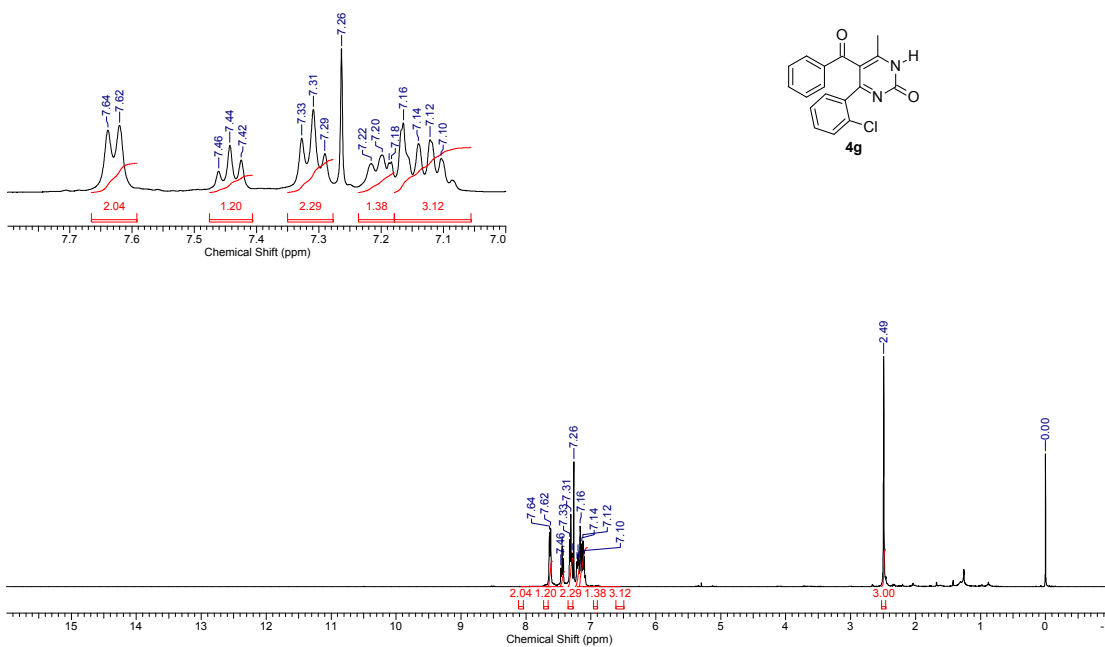

Figure S17. <sup>1</sup>H NMR spectrum of compound 4g

1621-K242-1-C.ESP

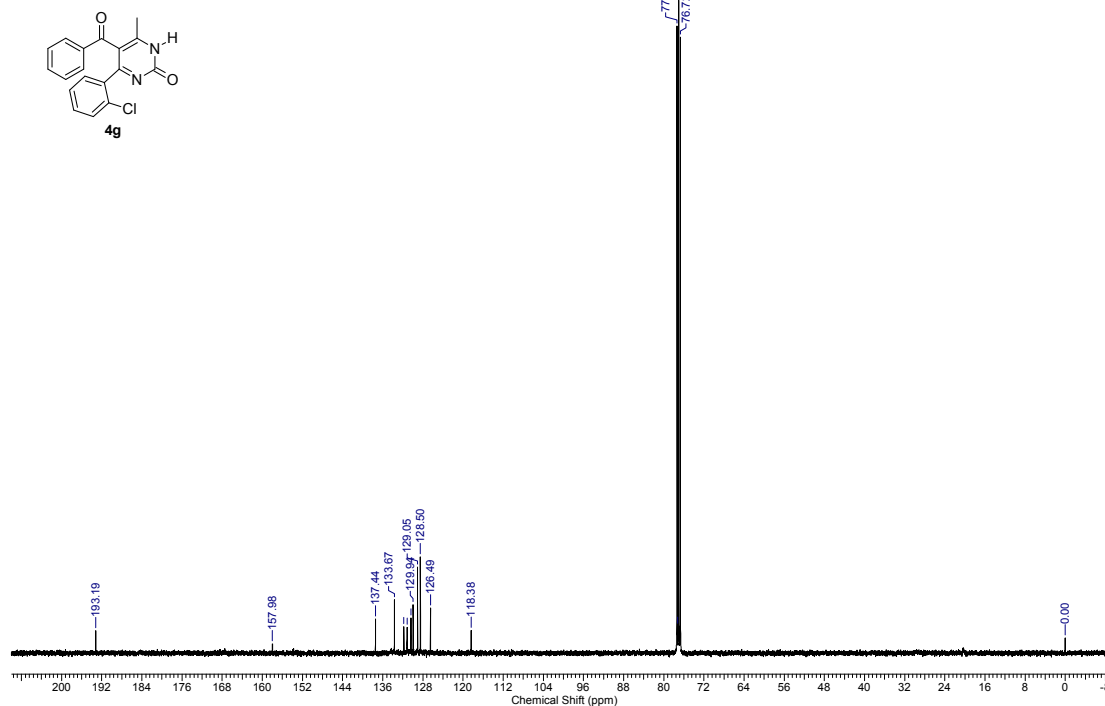

Figure S18. <sup>13</sup>C NMR spectrum of compound **4g**

14270-K203-6-H.ESP

14270-K203-6-H.ESP

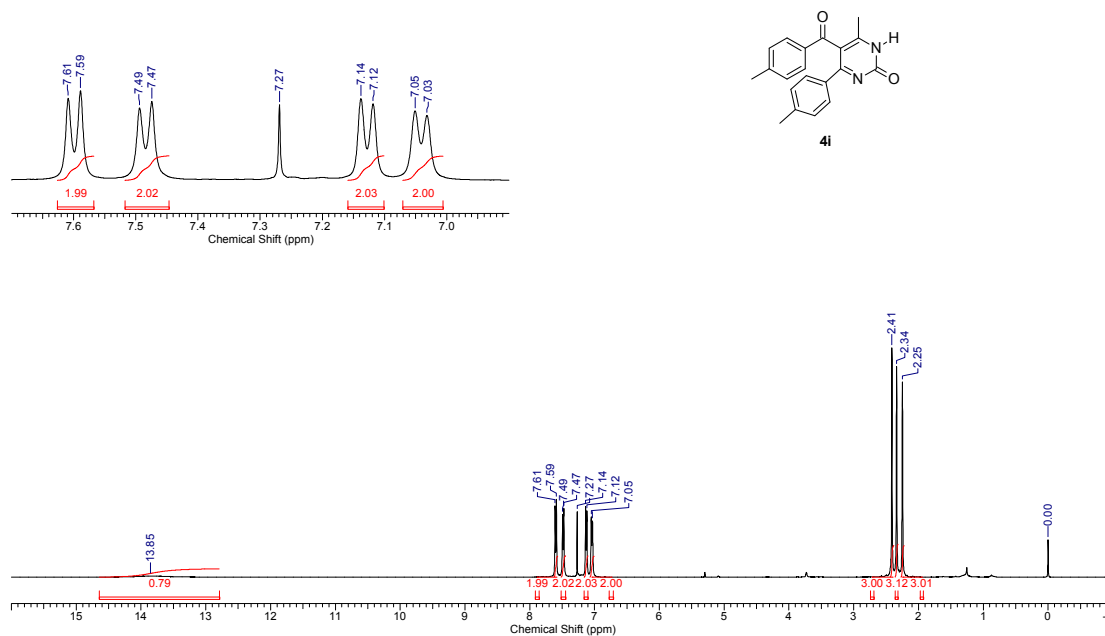

Figure S19. <sup>1</sup>H NMR spectrum of compound **4i**

14271-K203-6-C.ESP

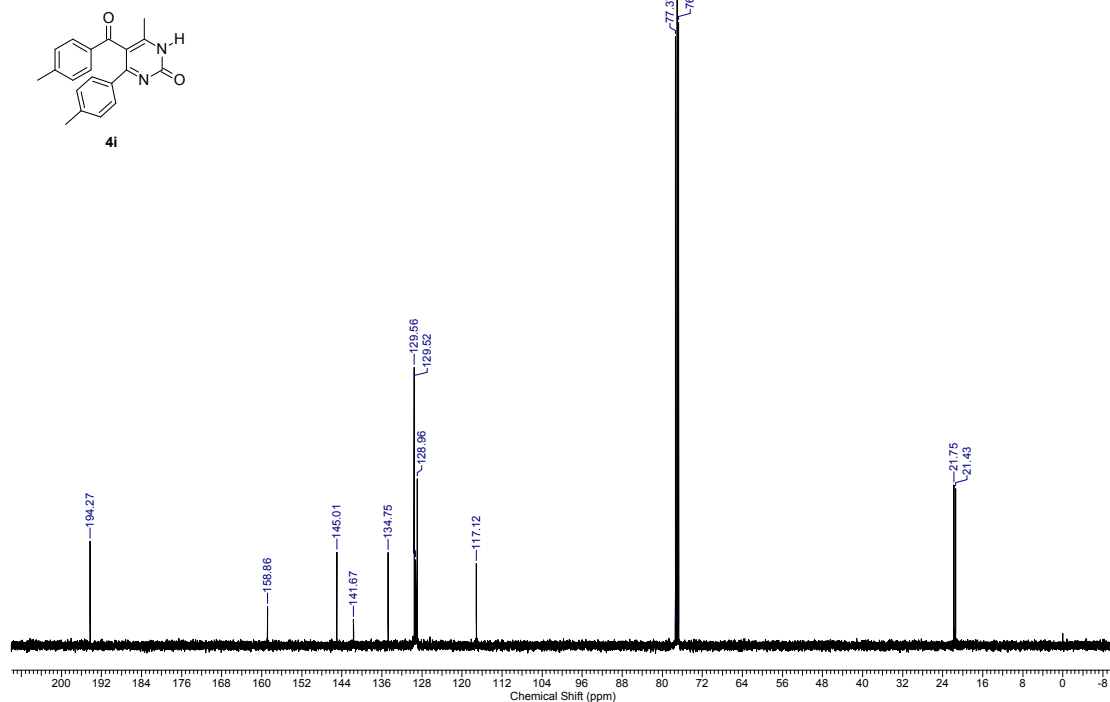

Figure S20. <sup>13</sup>C NMR spectrum of compound **4i**

350-K205-8-H.ESP  
350-K205-8-H.ESP

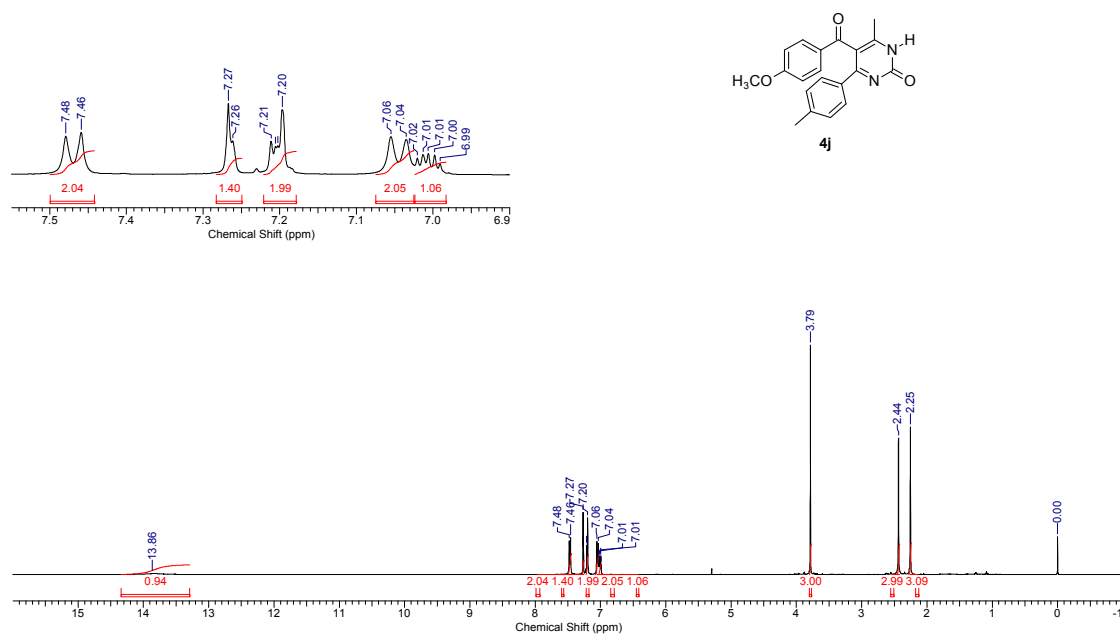

Figure S21. <sup>1</sup>H NMR spectrum of compound **4j**

211-K205-8-C.ESP

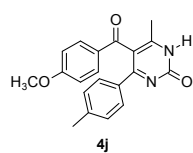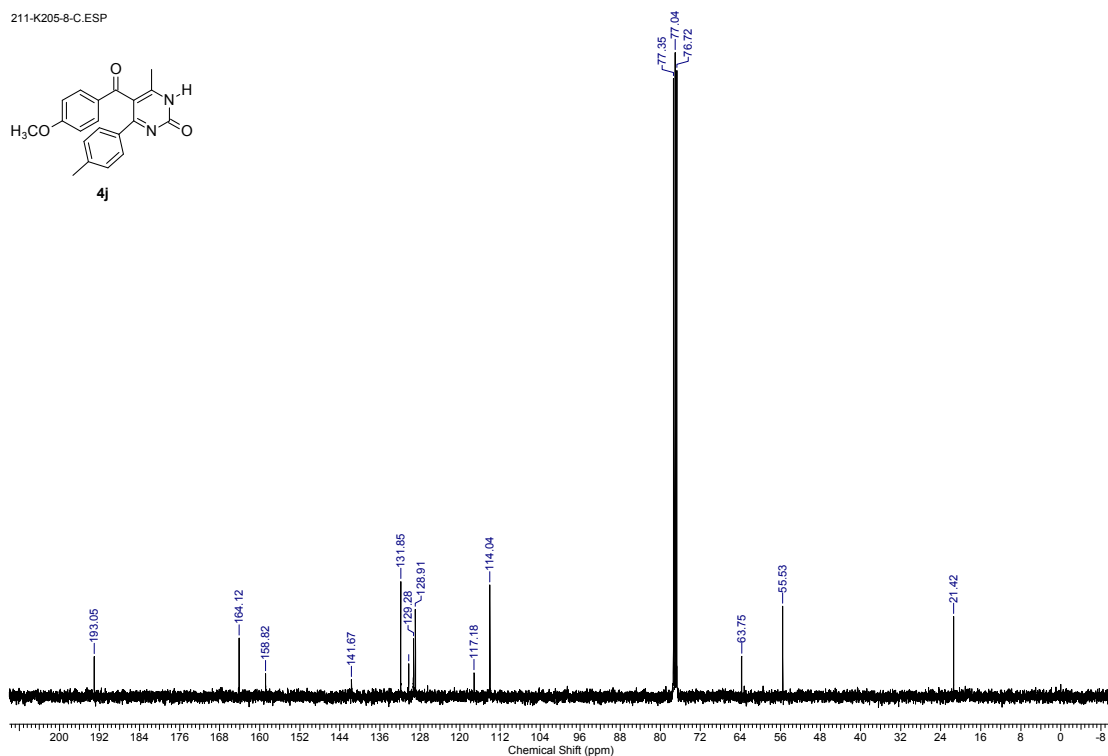

Figure S22. <sup>13</sup>C NMR spectrum of compound 4j

14280-K206-4-1-H.ESP

14280-K206-4-1-H.ESP

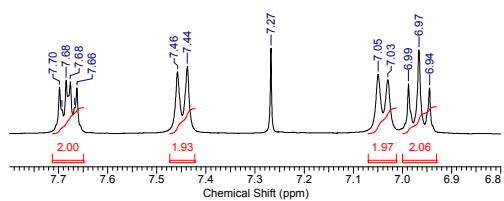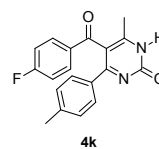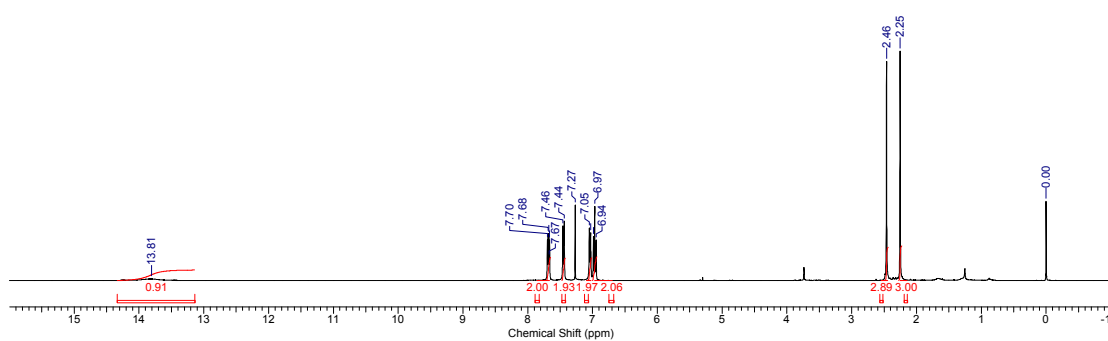

Figure S23. <sup>1</sup>H NMR spectrum of compound 4k

14281-K206-4-1-C.ESP

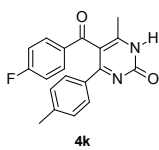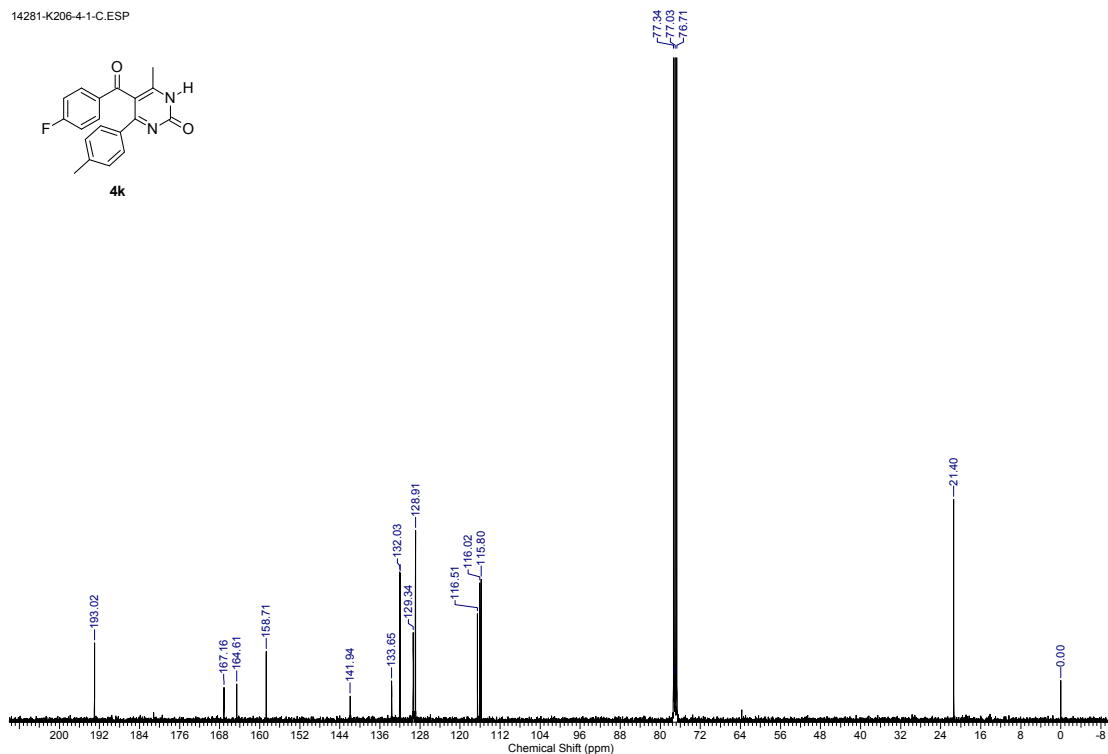

**Figure S24.** <sup>13</sup>C NMR spectrum of compound **4k**

14790-K206-4-1-F.ESP

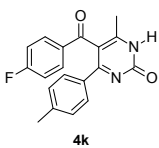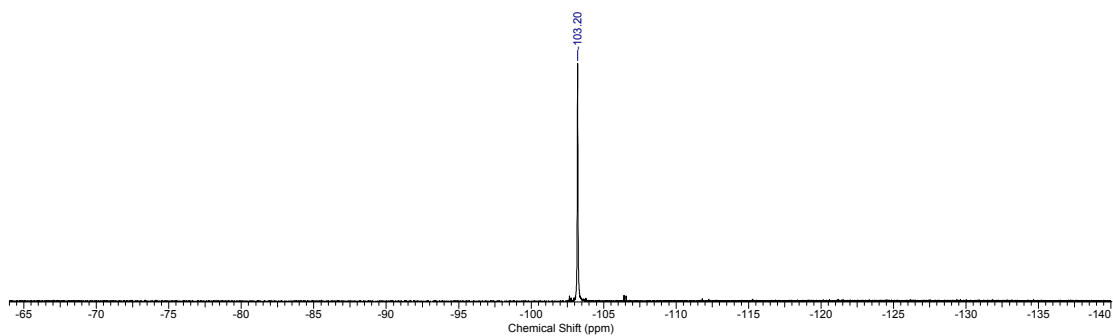

**Figure S25.** <sup>19</sup>F NMR spectrum of compound **4k**

370-K207-9-H.ESP  
370-K207-9-H.ESP

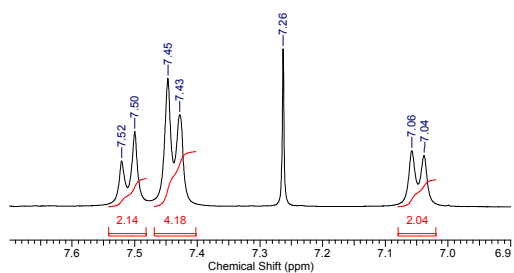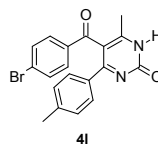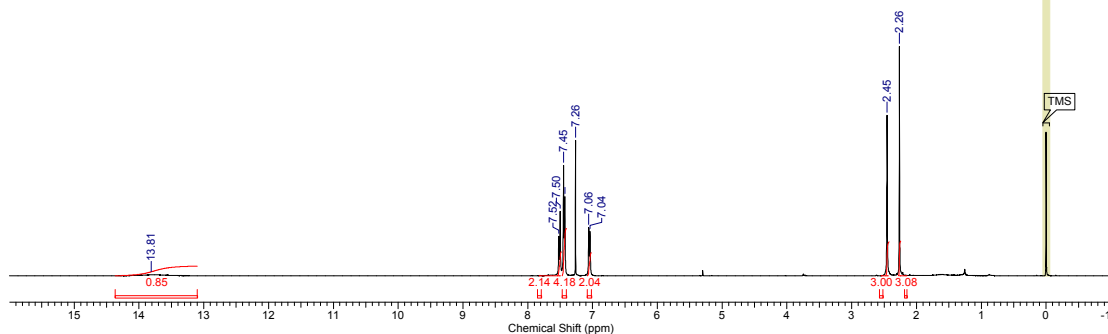

Figure S26. <sup>1</sup>H NMR spectrum of compound 4i

321-K207-7-C.ESP

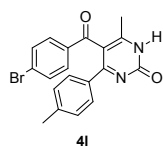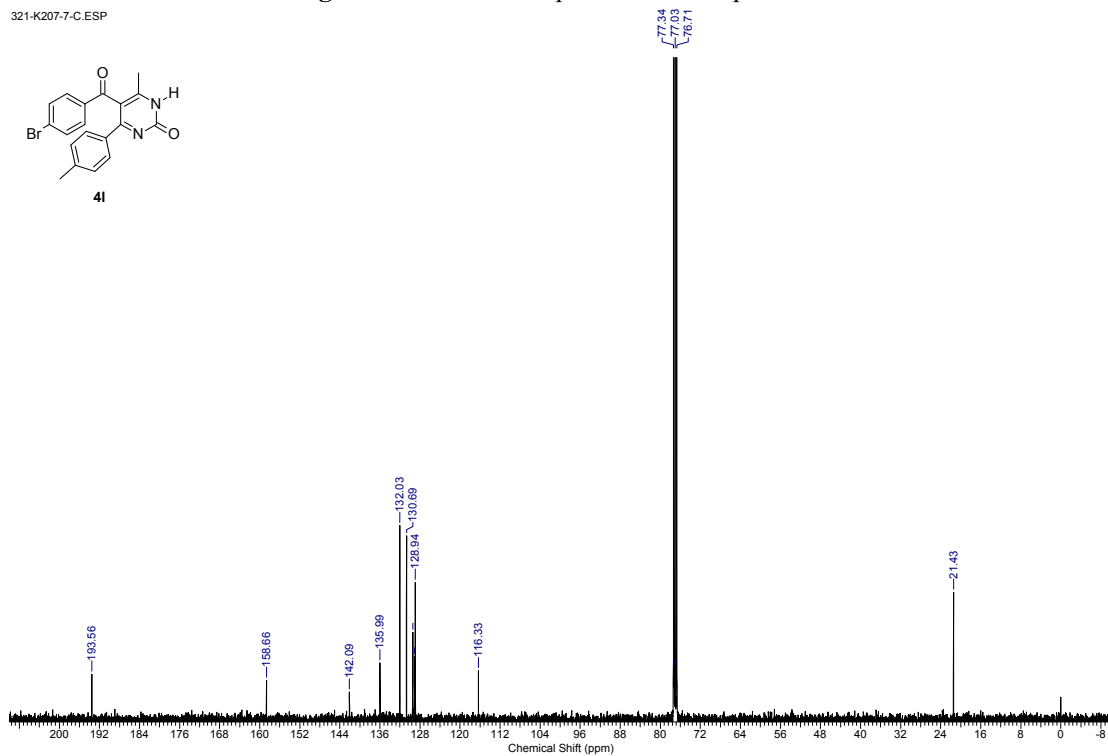

Figure S27. <sup>13</sup>C NMR spectrum of compound 4i

330-K220-5-H.ESP  
330-K220-5-H.ESP

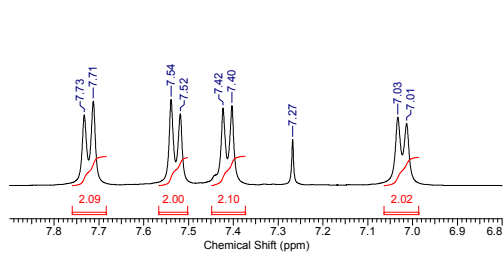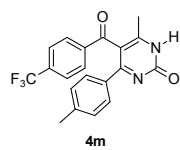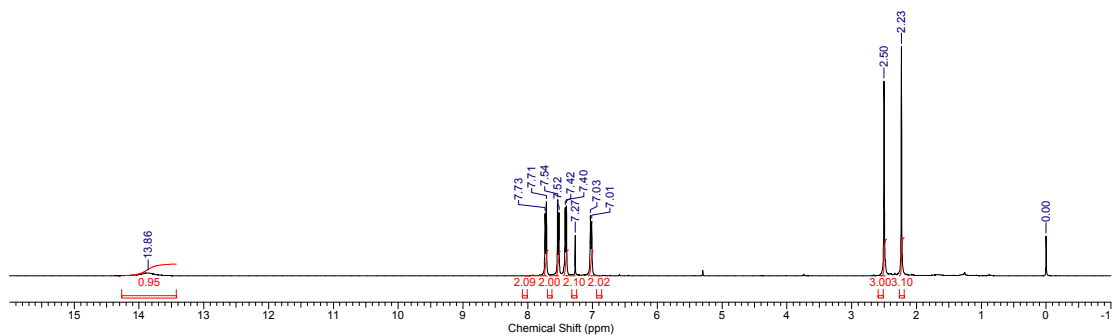

Figure S28. <sup>1</sup>H NMR spectrum of compound 4m

550-K220-5-C.ESP

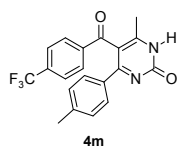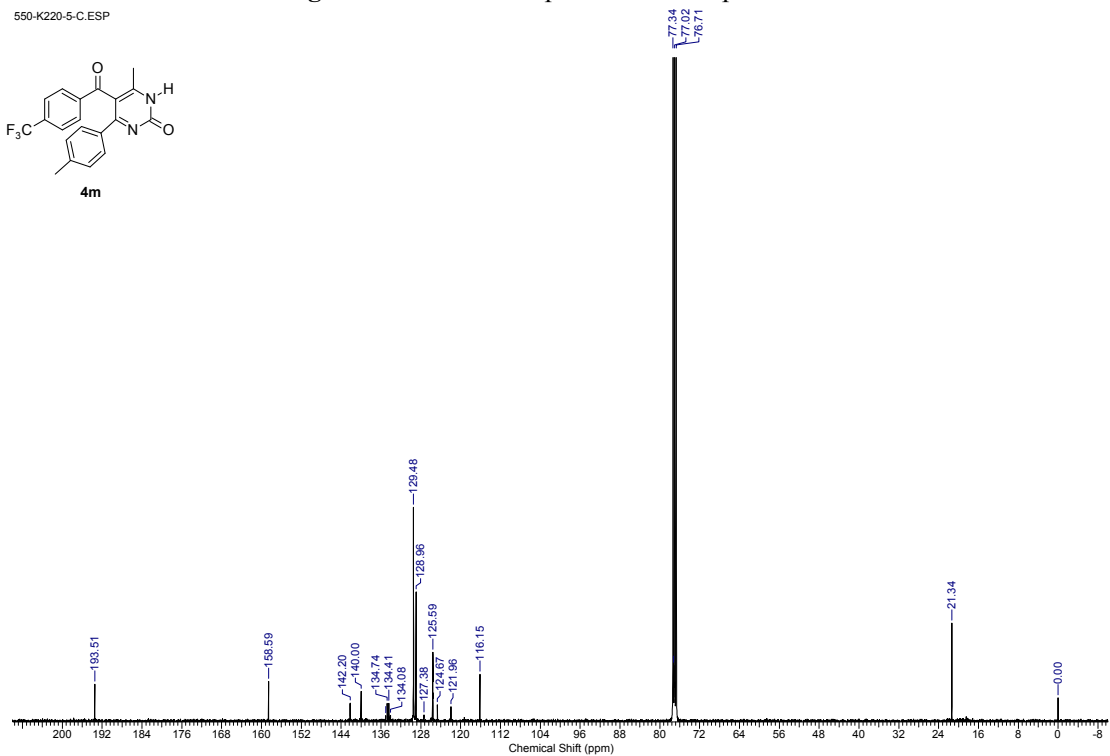

Figure S29. <sup>13</sup>C NMR spectrum of compound 4m



331-K220-5-F.ESP

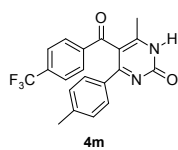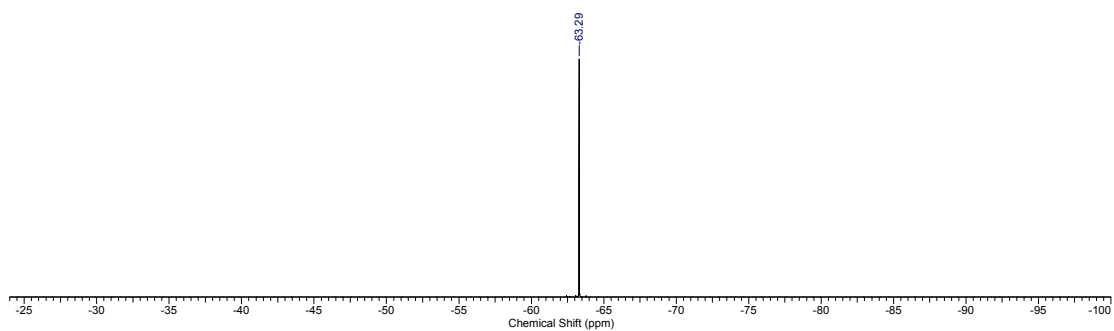

Figure S30. <sup>19</sup>F NMR spectrum of compound 4m

13130-K219-2-H.ESP

13130-K219-2-H.ESP

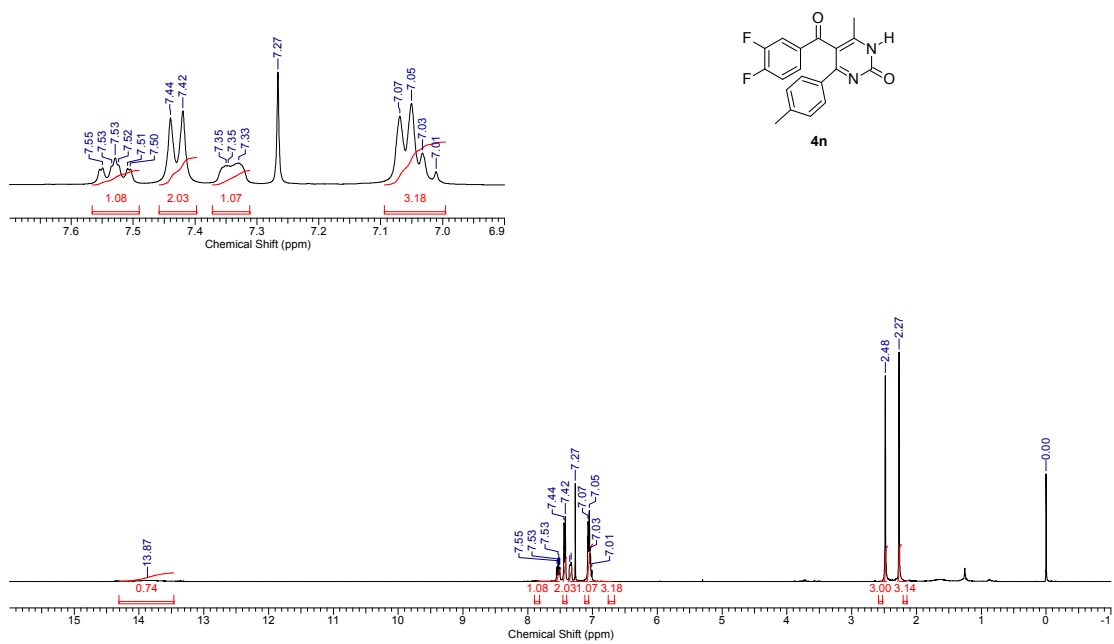

Figure S31. <sup>1</sup>H NMR spectrum of compound 4n

3380-K219-2-C.ESP

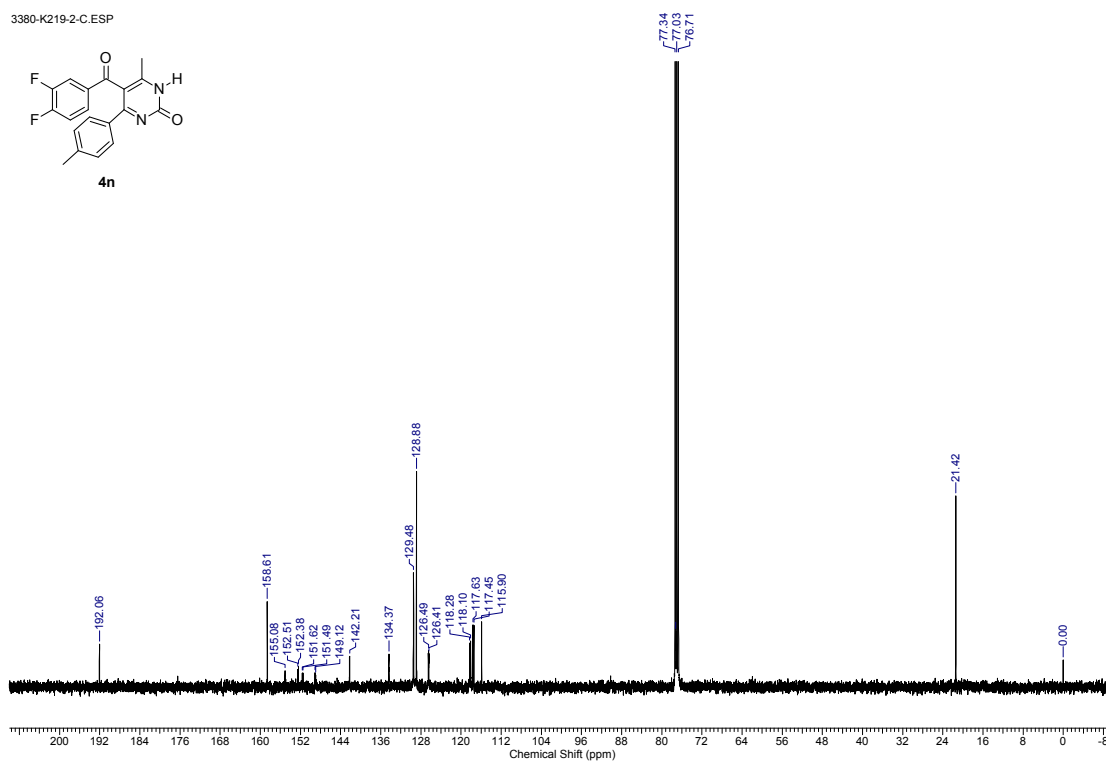

Figure S32.  $^{13}\text{C}$  NMR spectrum of compound **4n**

14780-K219-2-F.ESP

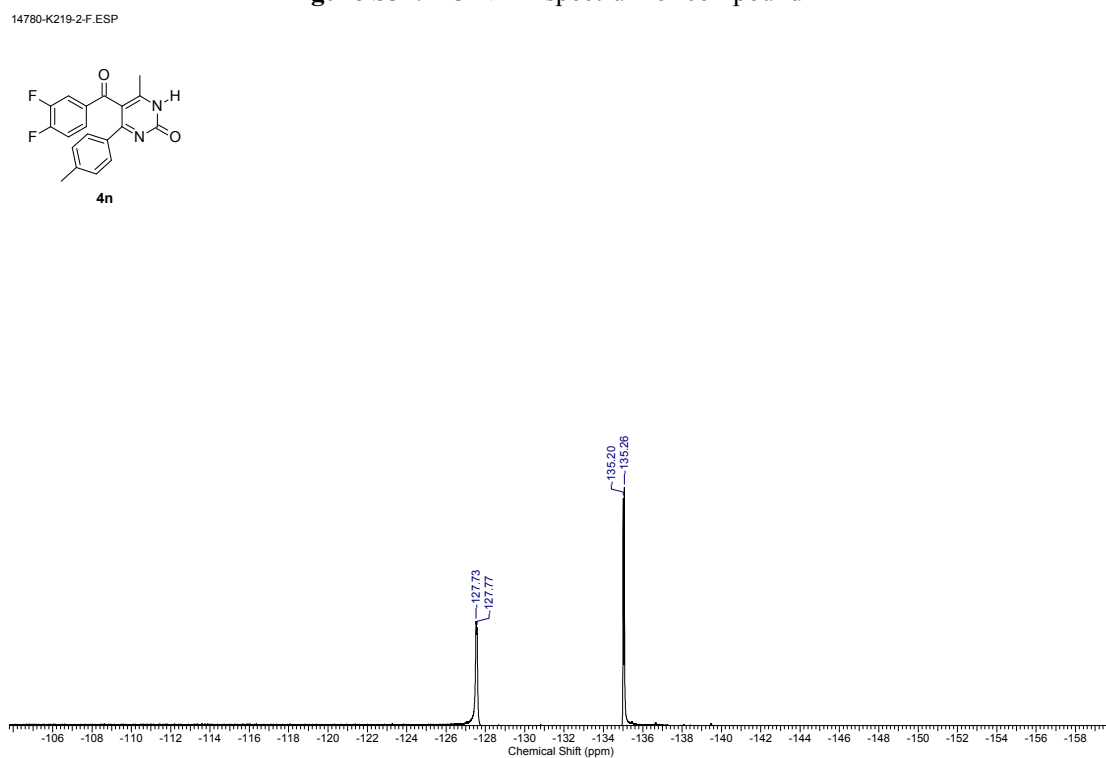

Figure S33.  $^{19}\text{F}$  NMR spectrum of compound **4n**

14690-K218-4-H.ESP  
14690-K218-4-H.ESP

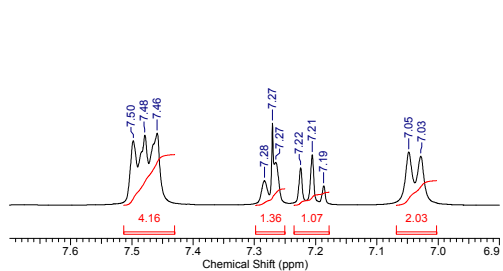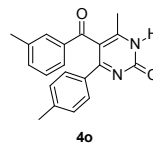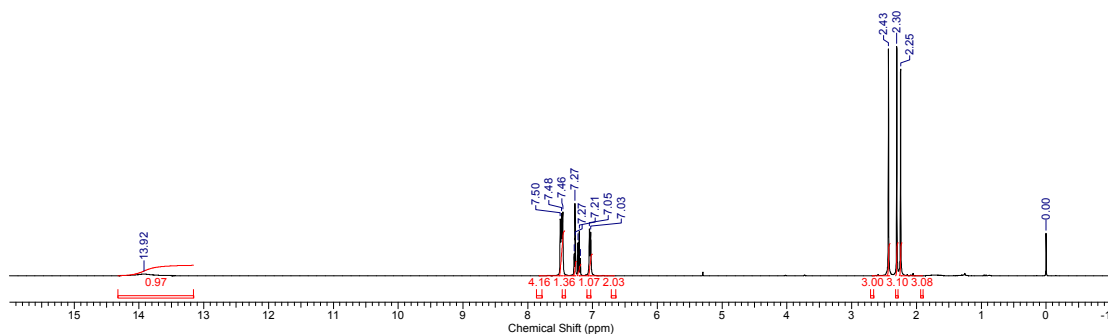

**Figure S34.**  $^1\text{H}$  NMR spectrum of compound **4o**

14691-K218-4-C.ESP

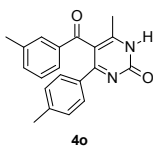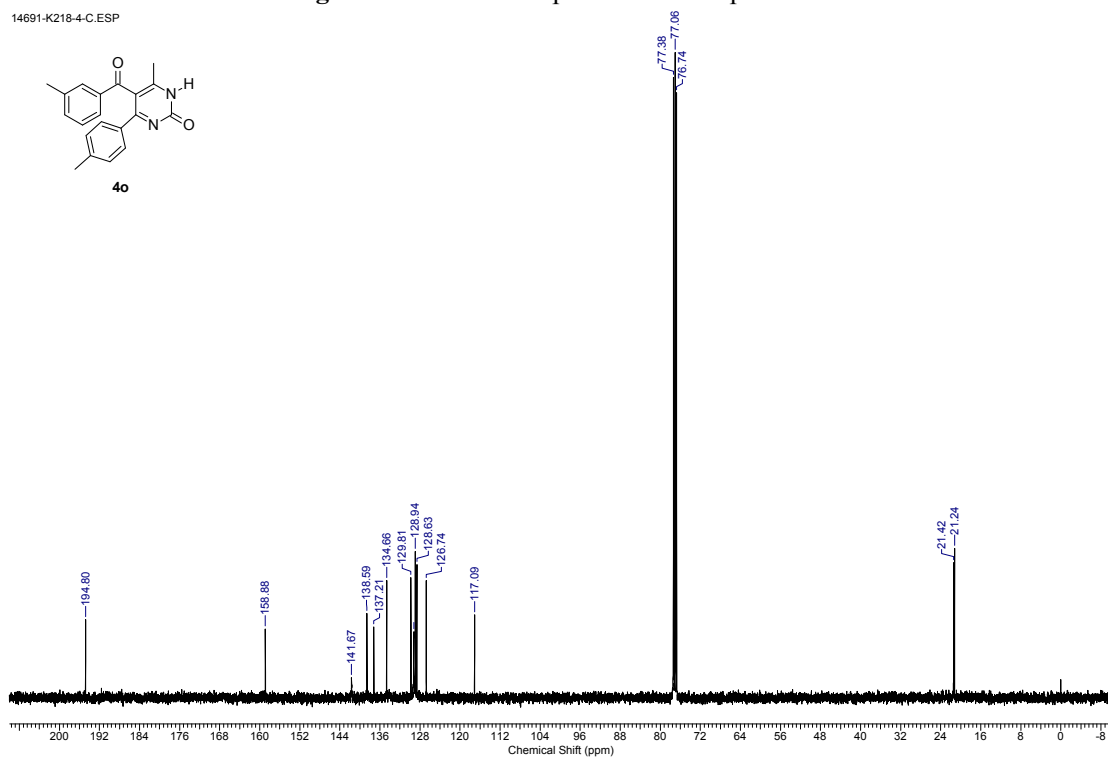

**Figure S35.**  $^{13}\text{C}$  NMR spectrum of compound **4o**

560-K209-2-H.ESP  
560-K209-2-H.ESP

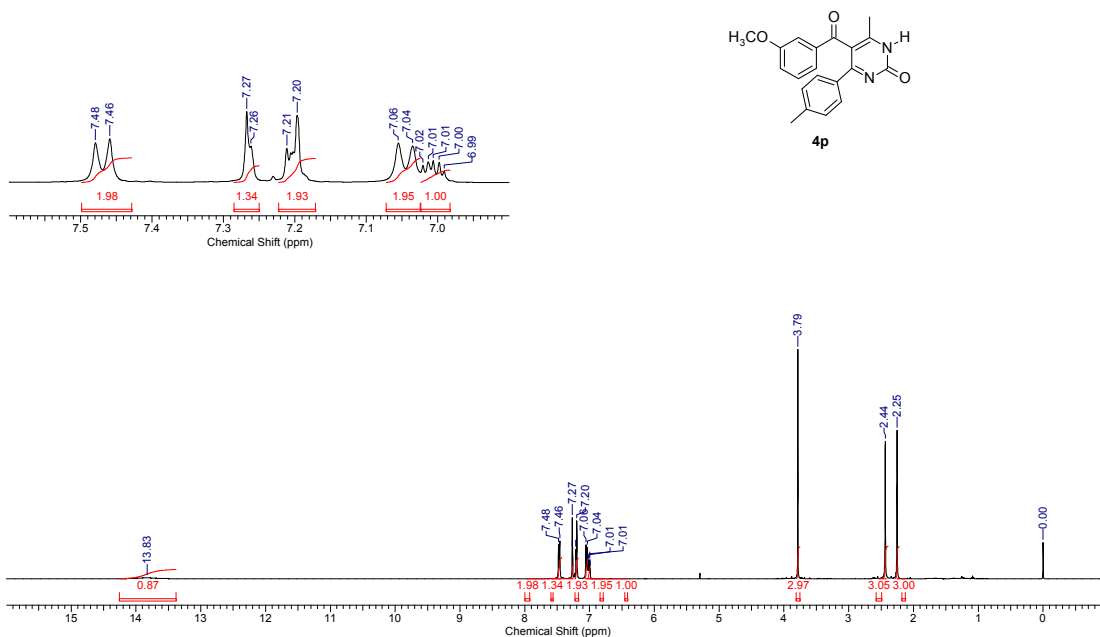

Figure S36. <sup>1</sup>H NMR spectrum of compound 4p

561-K209-2-C.ESP

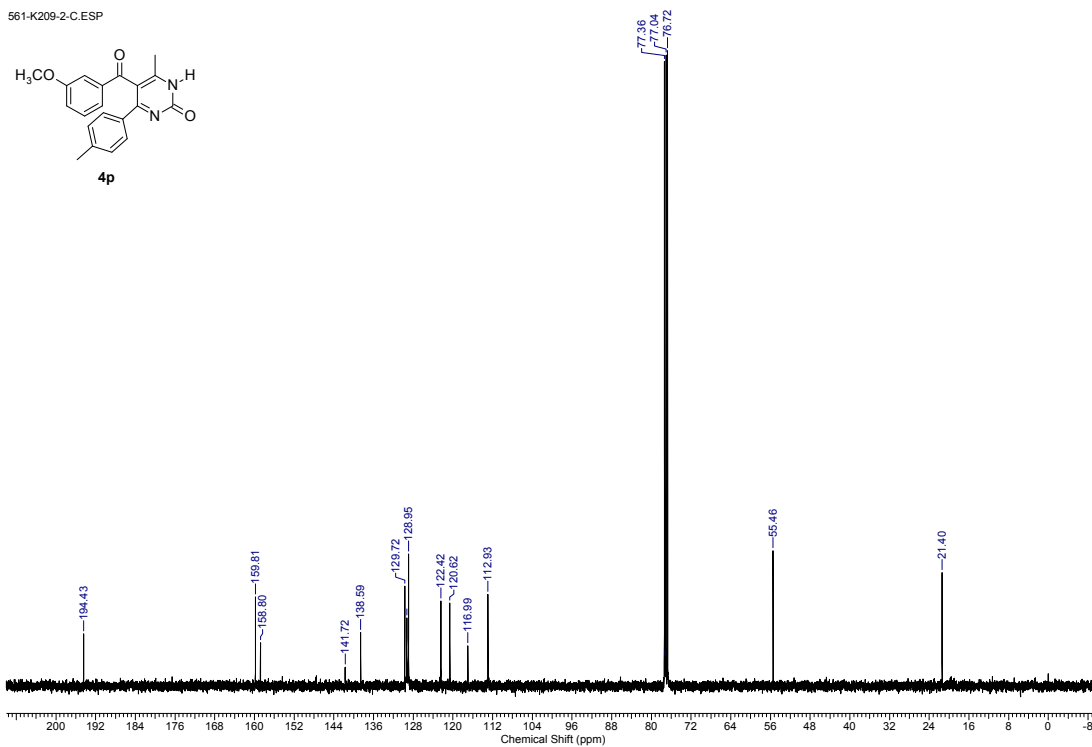

Figure S37. <sup>13</sup>C NMR spectrum of compound 4p

14700-K221-4-H.ESP  
14700-K221-4-H.ESP

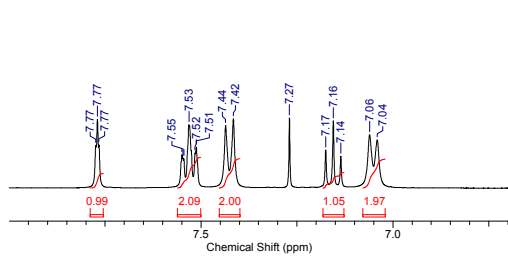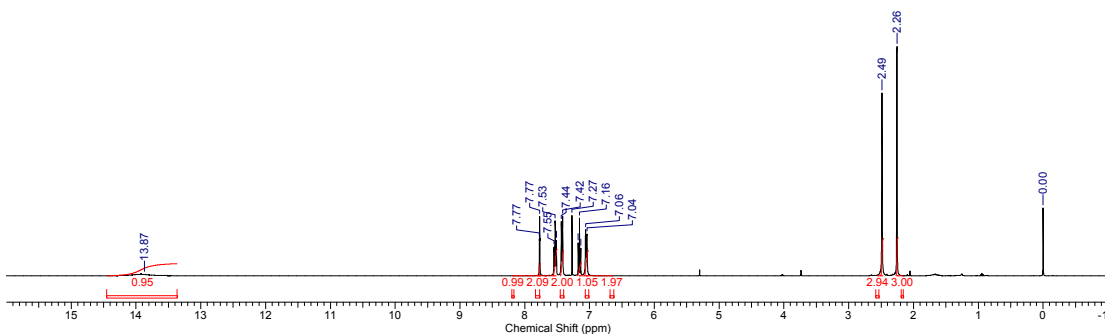

Figure S38. <sup>1</sup>H NMR spectrum of compound 4q

14701-K221-3-C.ESP

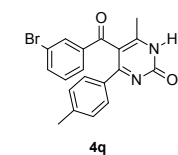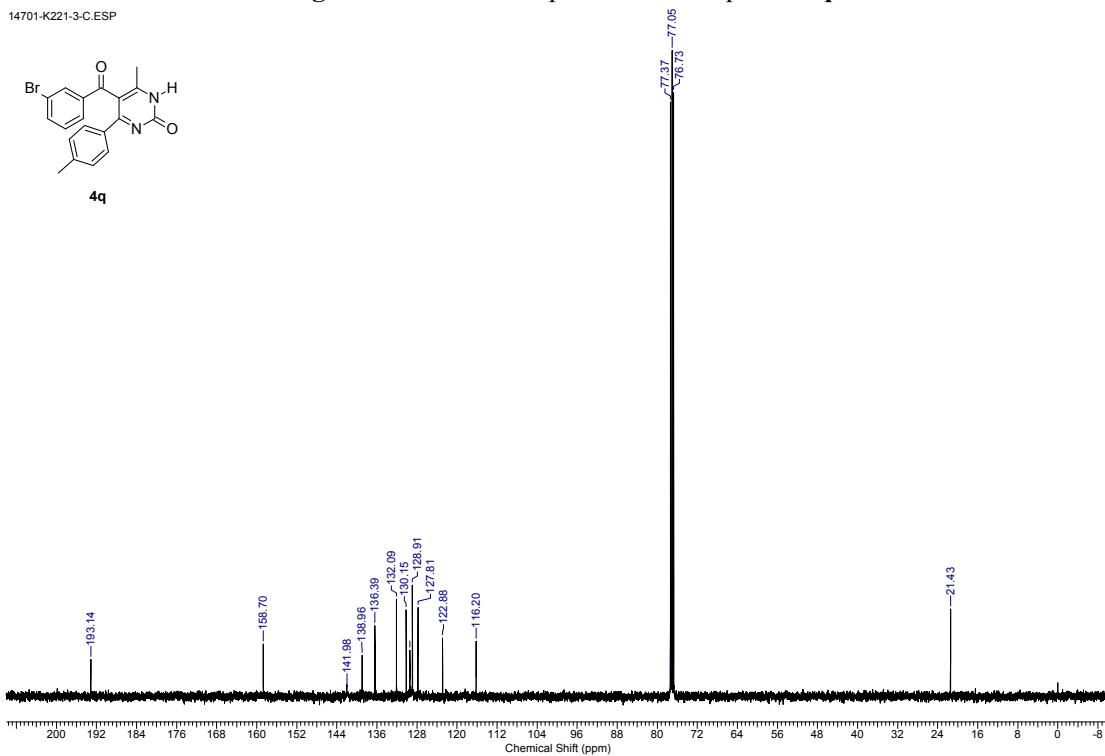

Figure S39. <sup>13</sup>C NMR spectrum of compound 4q

790-K208-2-H.ESP  
790-K208-2-H.ESP

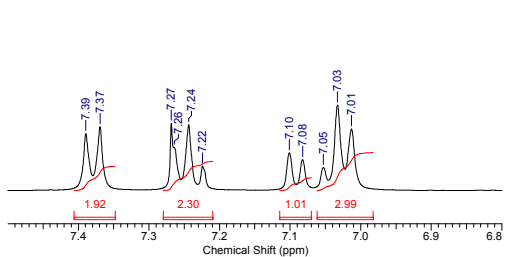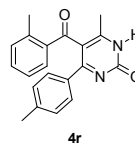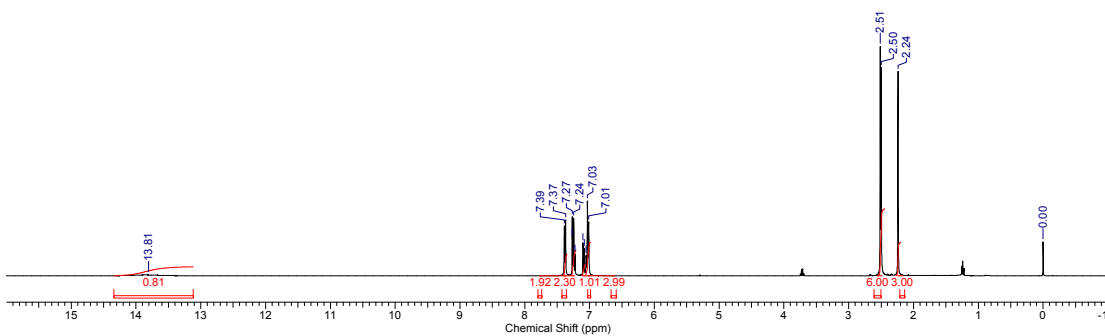

**Figure S40.**  $^1\text{H}$  NMR spectrum of compound **4r**

501-K208-2-C.ESP

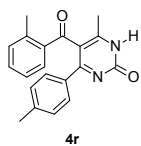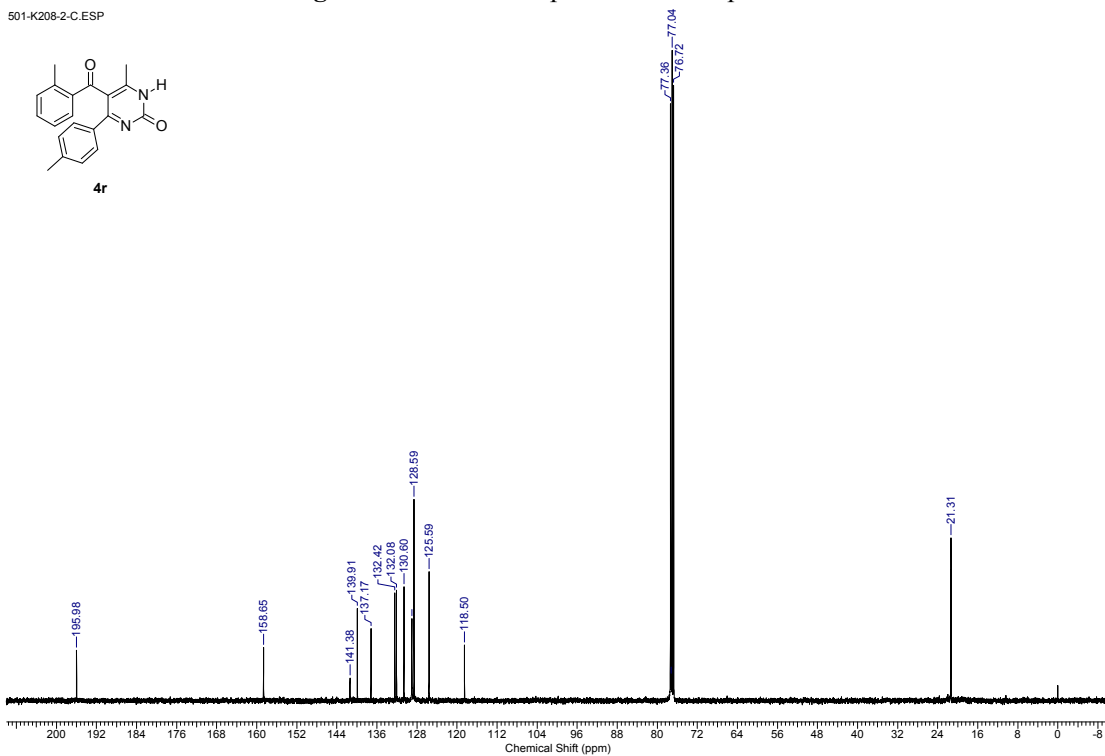

**Figure S41.**  $^{13}\text{C}$  NMR spectrum of compound **4r**

800-K217-2-H.ESP  
800-K217-2-H.ESP

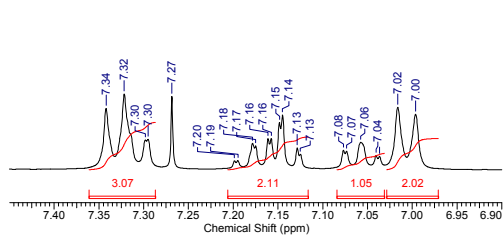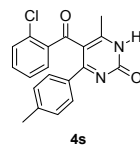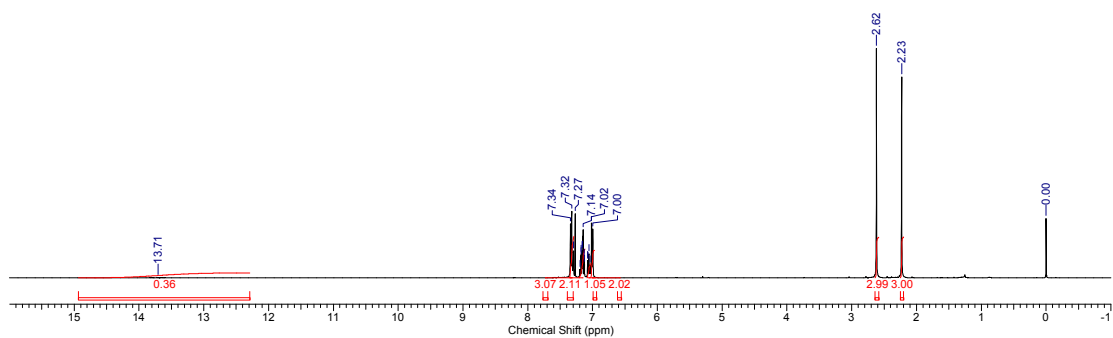

Figure S42. <sup>1</sup>H NMR spectrum of compound 4s

512-K217-2-C.ESP

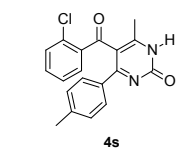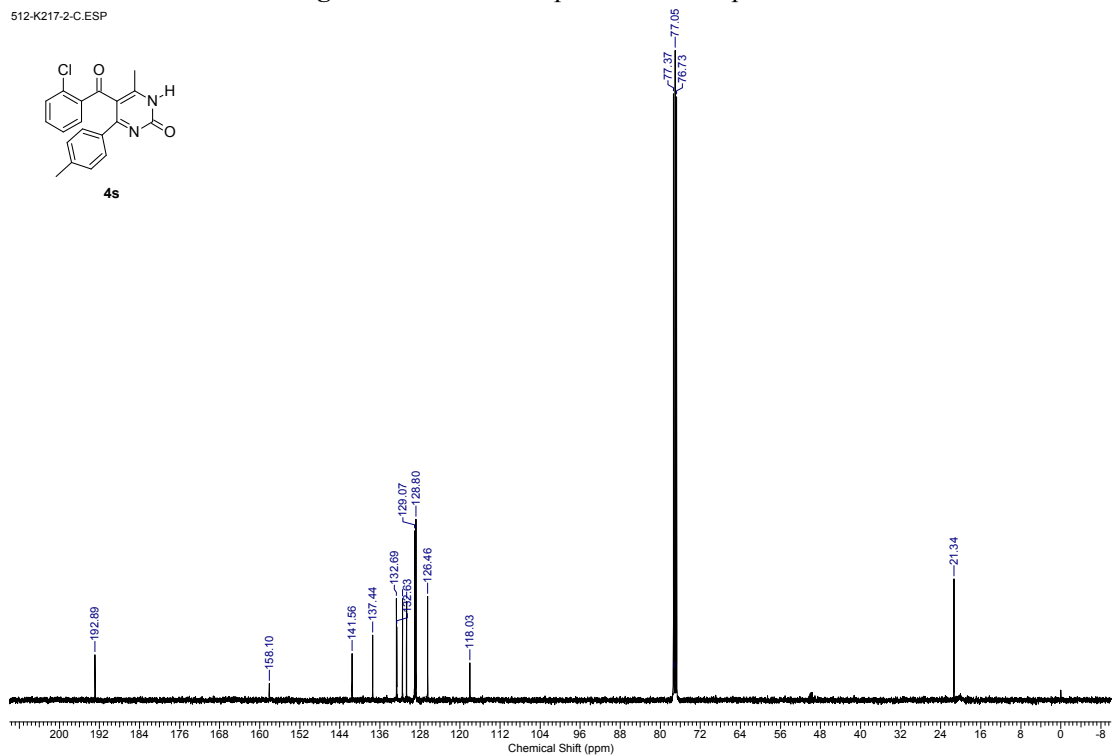

Figure S43. <sup>13</sup>C NMR spectrum of compound 4s

820-K226-2-H.ESP  
820-K226-2-H.ESP

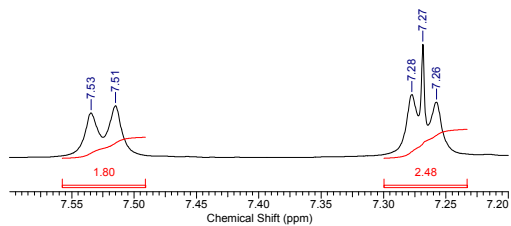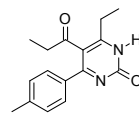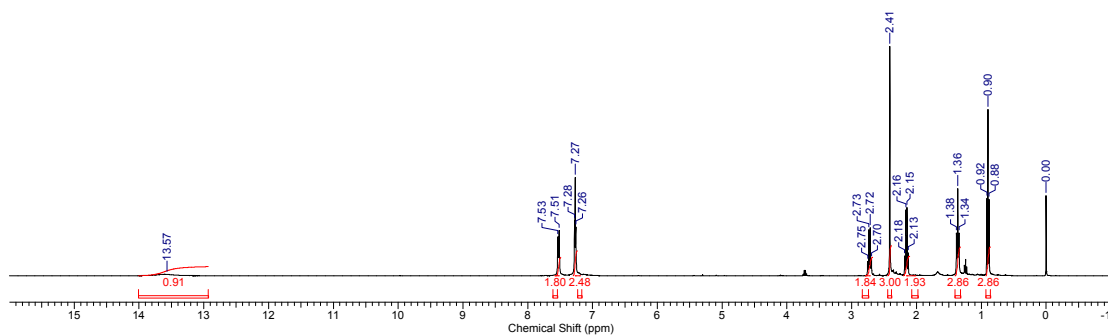

Figure S44. <sup>1</sup>H NMR spectrum of compound 4t

681-K226-2-C.ESP

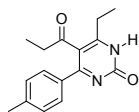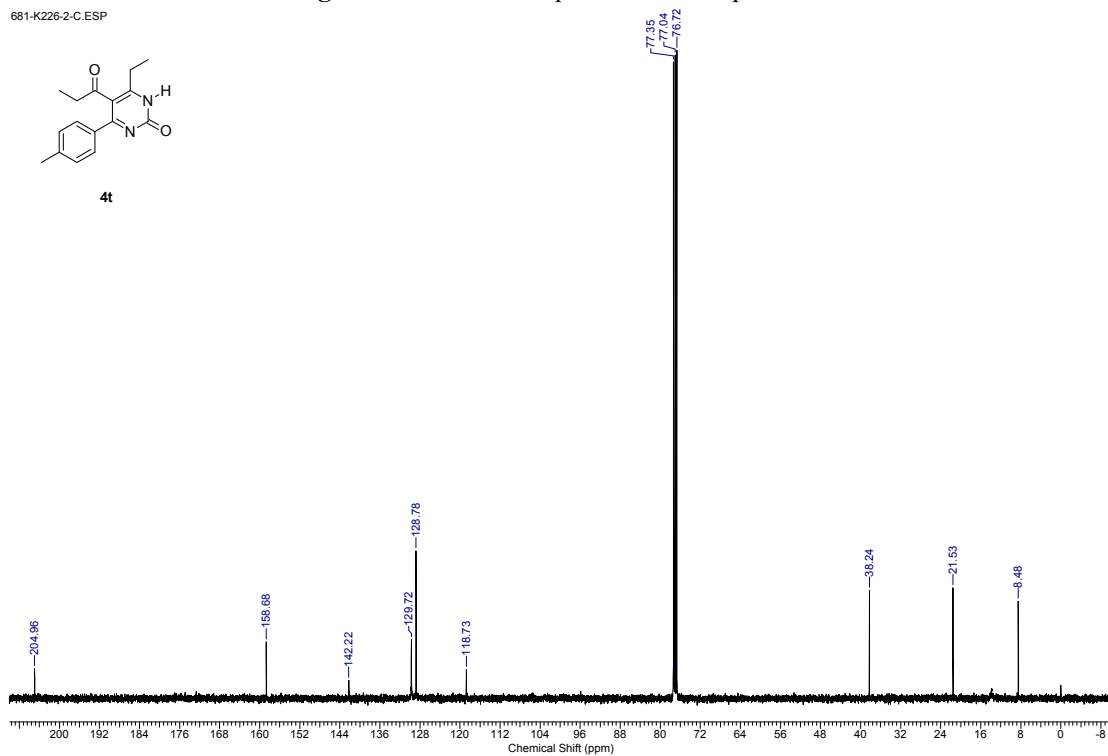

Figure S45. <sup>13</sup>C NMR spectrum of compound 4t



14180-K232-3-H.ESP  
14180-K232-3-H.ESP

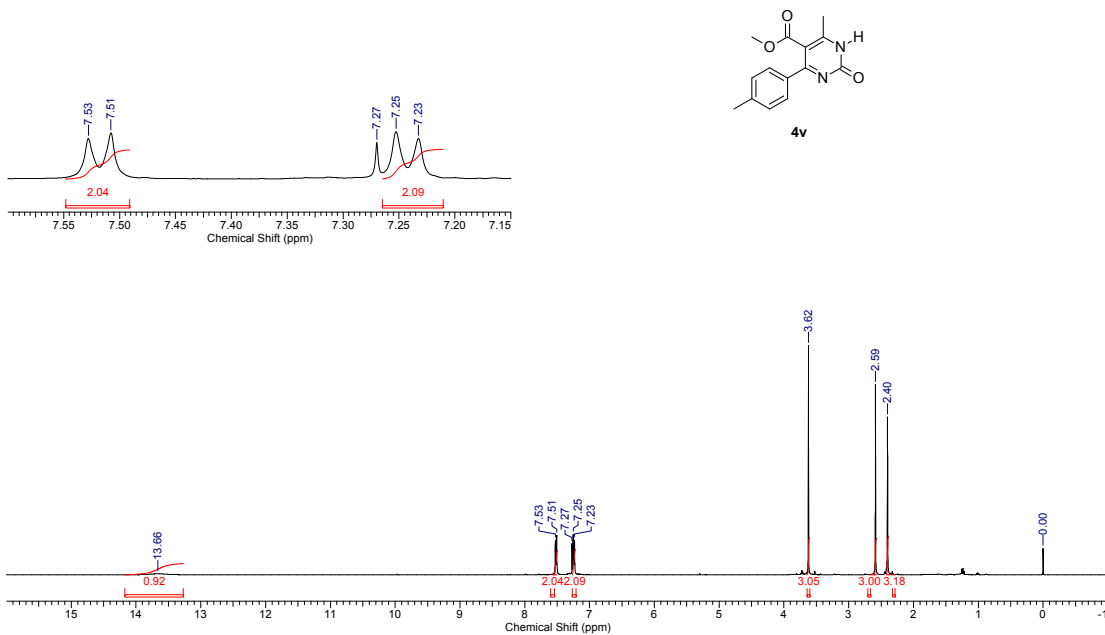

Figure S46. <sup>1</sup>H NMR spectrum of compound 4v

14300-K232-3-C.ESP

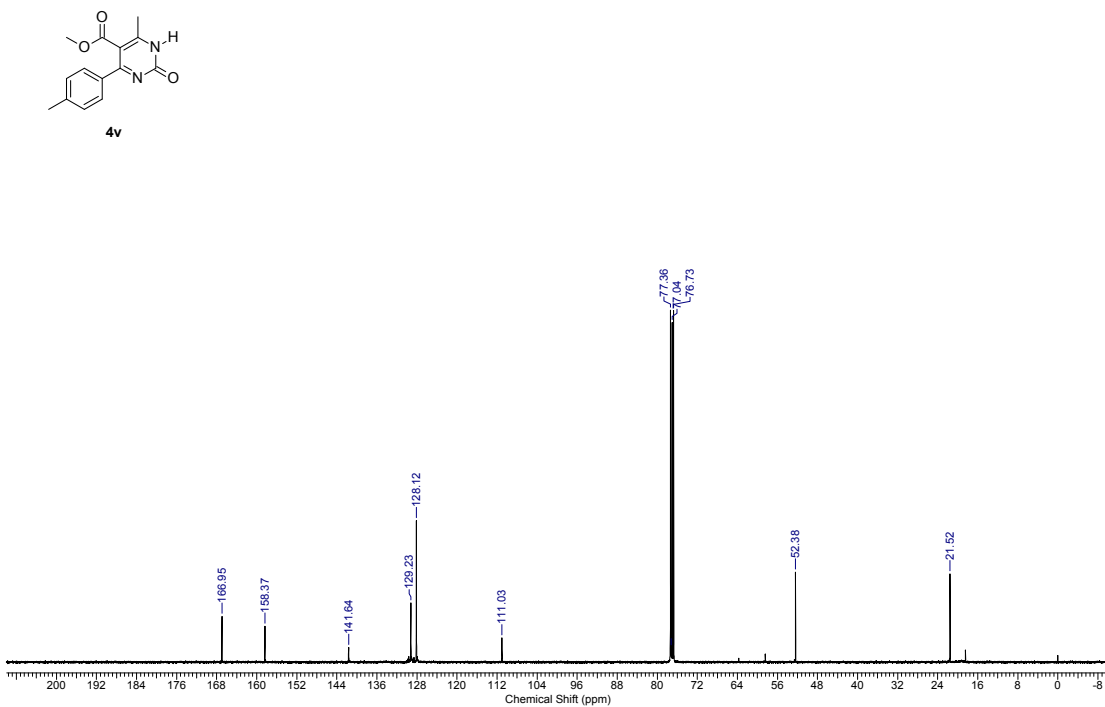

Figure S47. <sup>13</sup>C NMR spectrum of compound 4v

810-K222-2-H.ESP  
810-K222-2-H.ESP

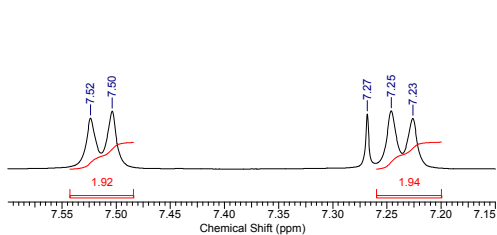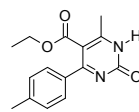

4w

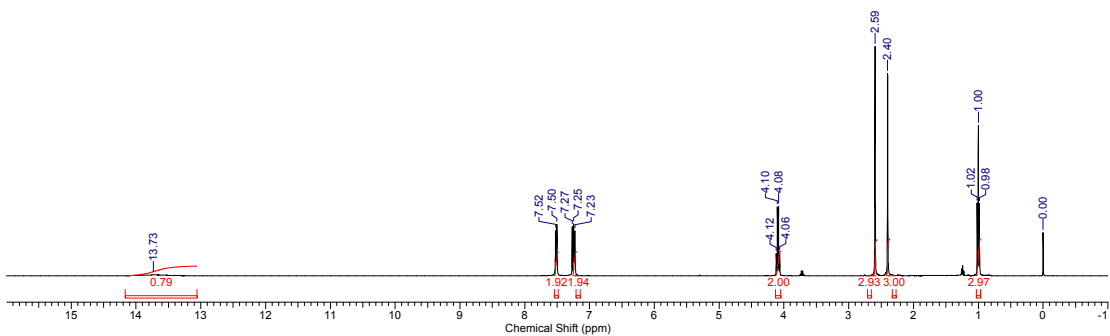

Figure S48. <sup>1</sup>H NMR spectrum of compound 4w

661-K222-2-C.ESP

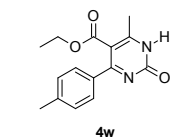

4w

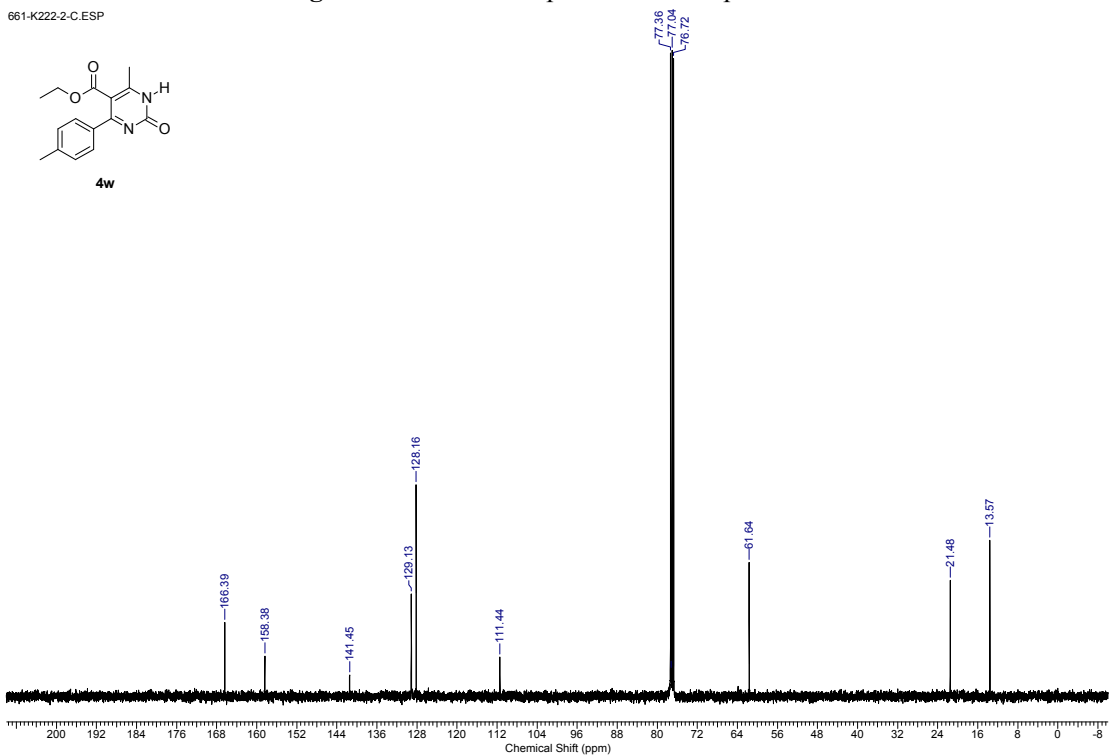

Figure S49. <sup>13</sup>C NMR spectrum of compound 4w

840-K223-2-H.ESP  
840-K223-2-H.ESP

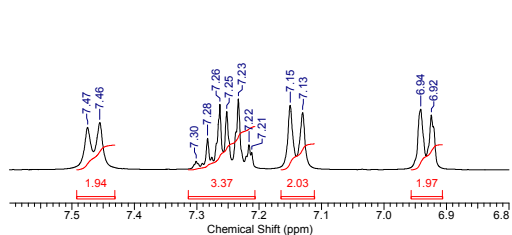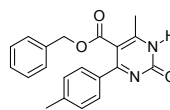

4x

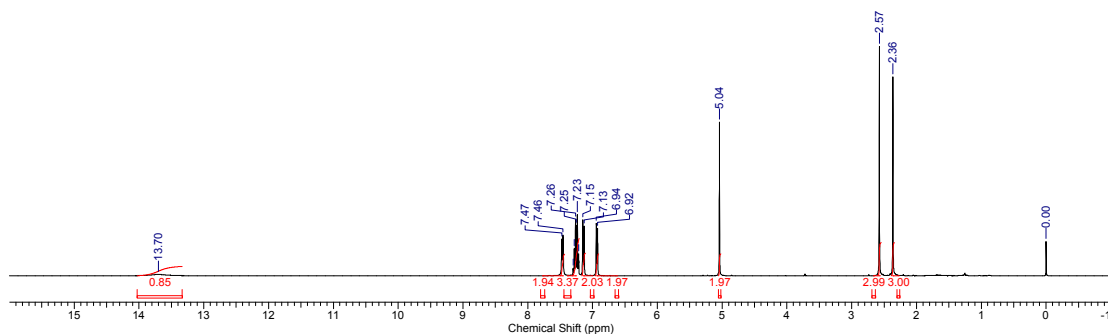

Figure S50. <sup>1</sup>H NMR spectrum of compound 4x

842-K223-2-C.ESP

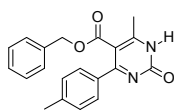

4x

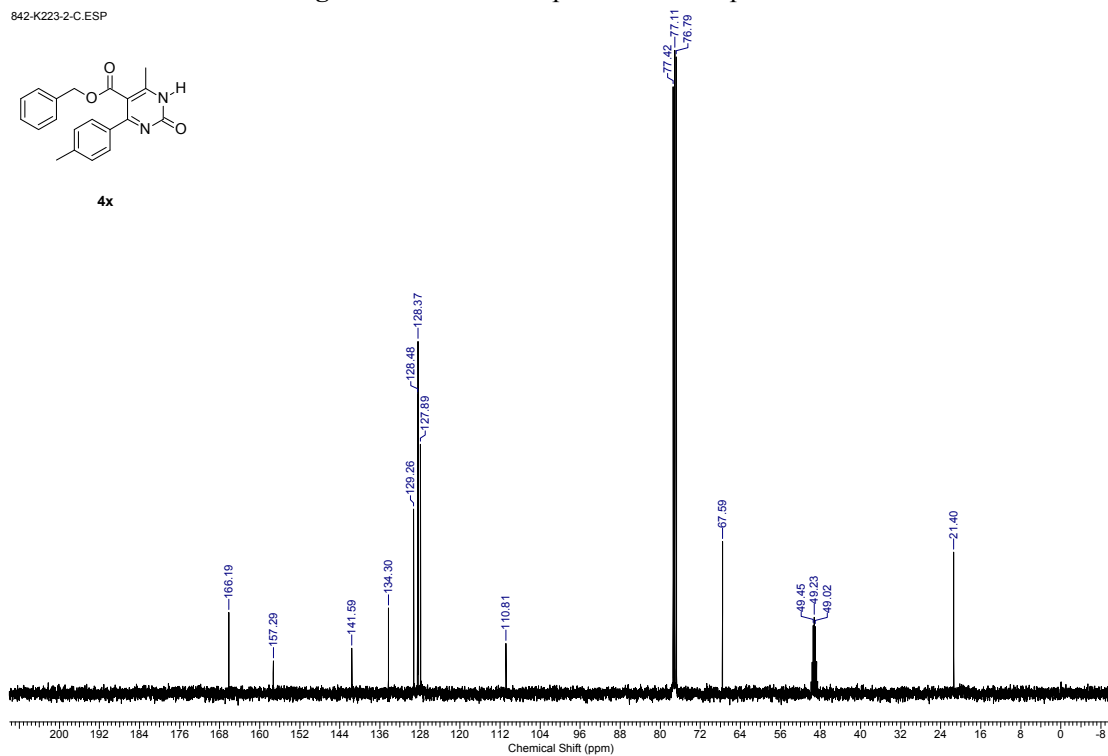

Figure S51. <sup>13</sup>C NMR spectrum of compound 4x

860-K230-2-H.ESP  
860-K230-2-H.ESP

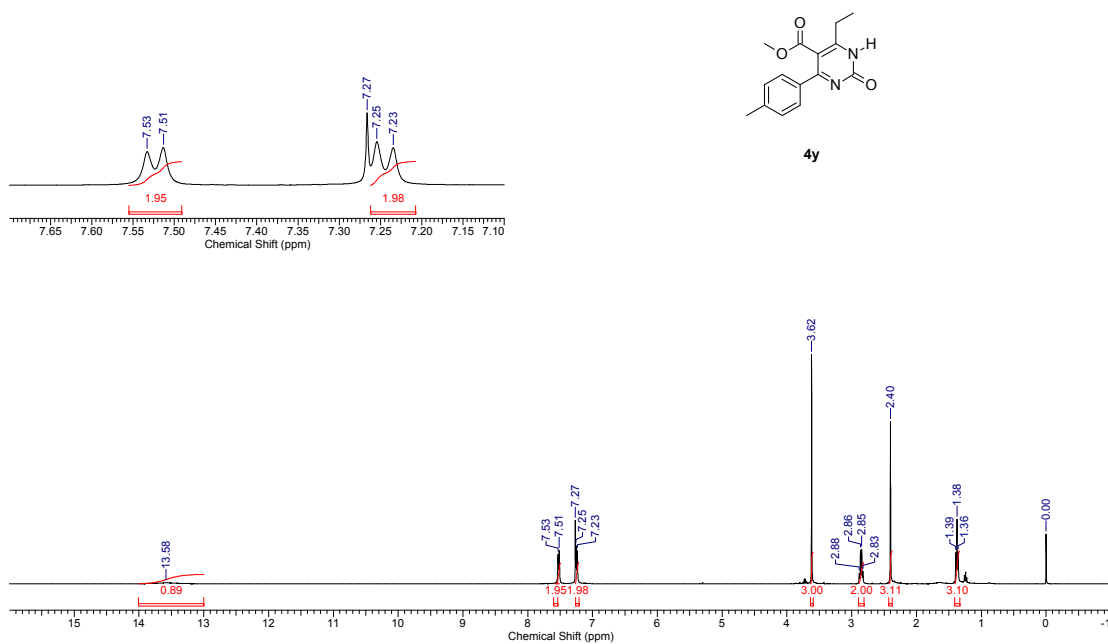

Figure S52. <sup>1</sup>H NMR spectrum of compound 4y

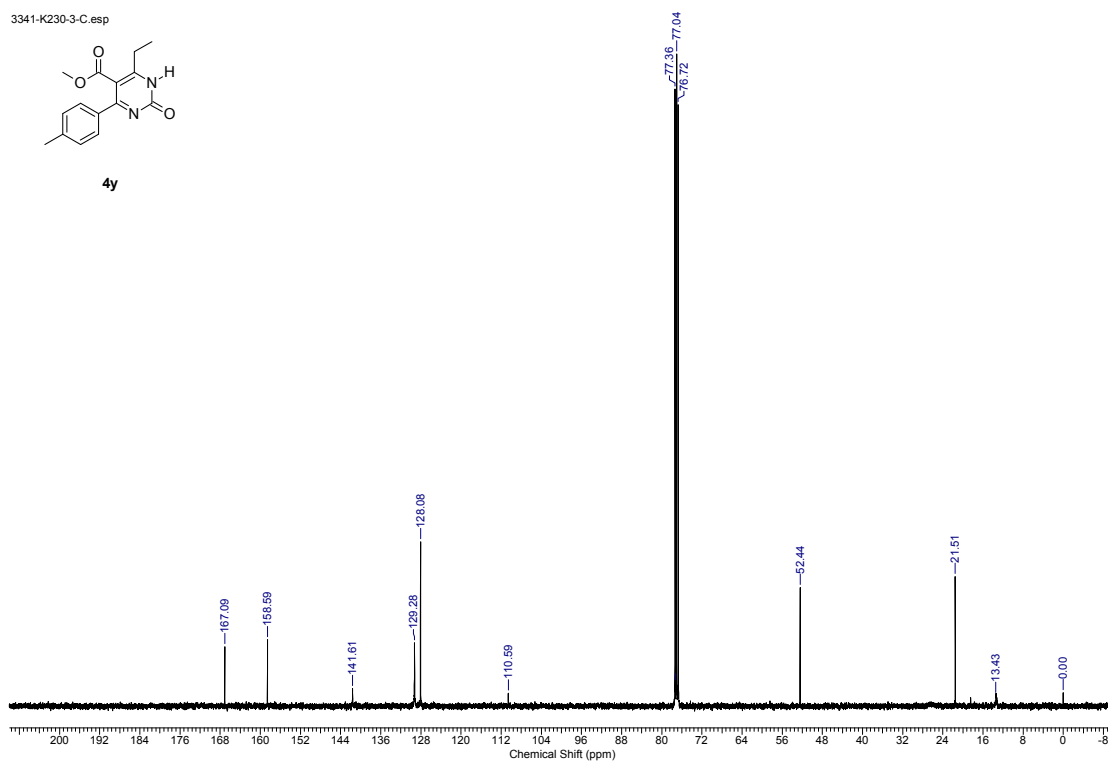

Figure S53. <sup>13</sup>C NMR spectrum of compound 4y

850-K229-2-H.ESP  
850-K229-2-H.ESP

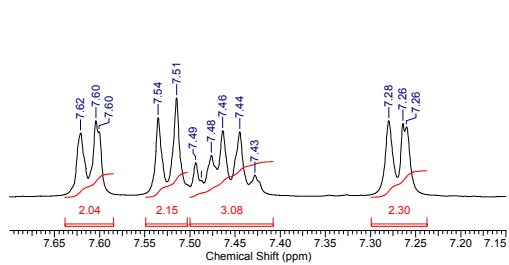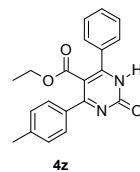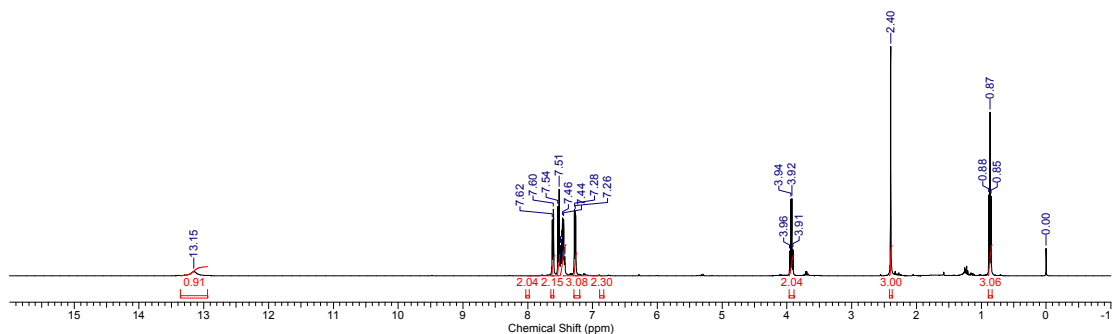

Figure S54. <sup>1</sup>H NMR spectrum of compound **4z** in CDCl<sub>3</sub>

3331-K229-3-C.esp

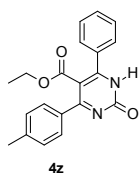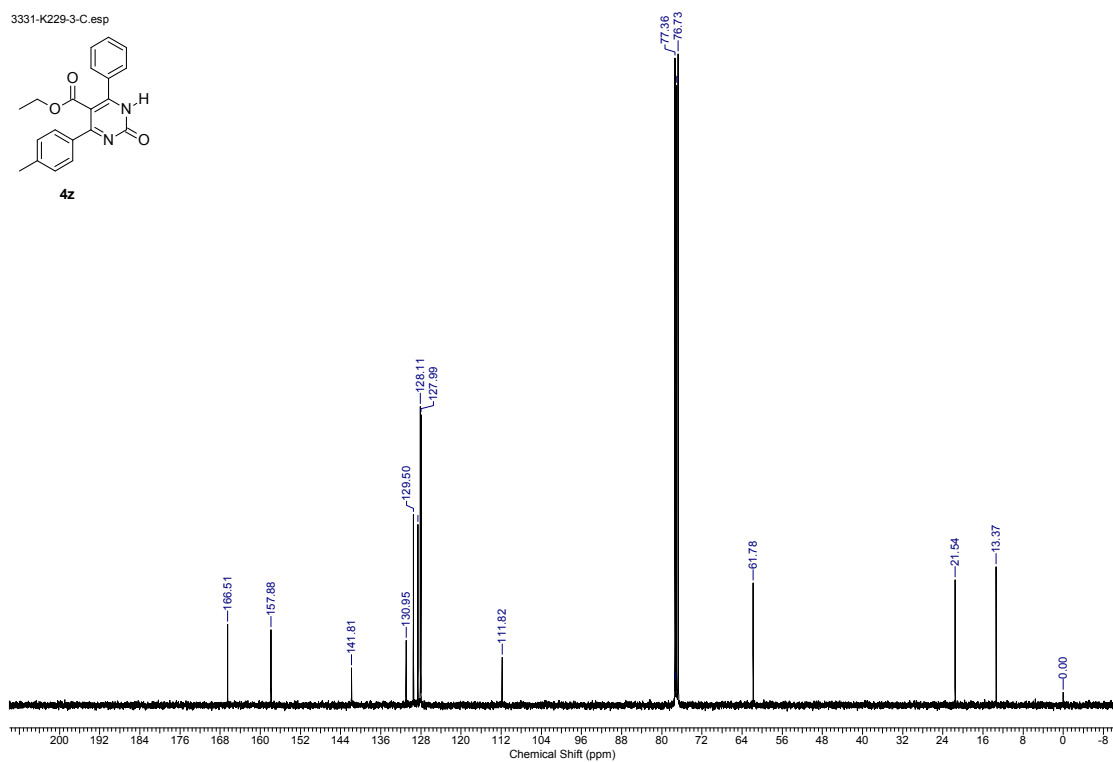

Figure S55. <sup>13</sup>C NMR spectrum of compound **4z** in CDCl<sub>3</sub>

6260-K229-H.ESP

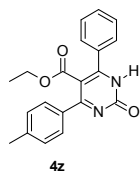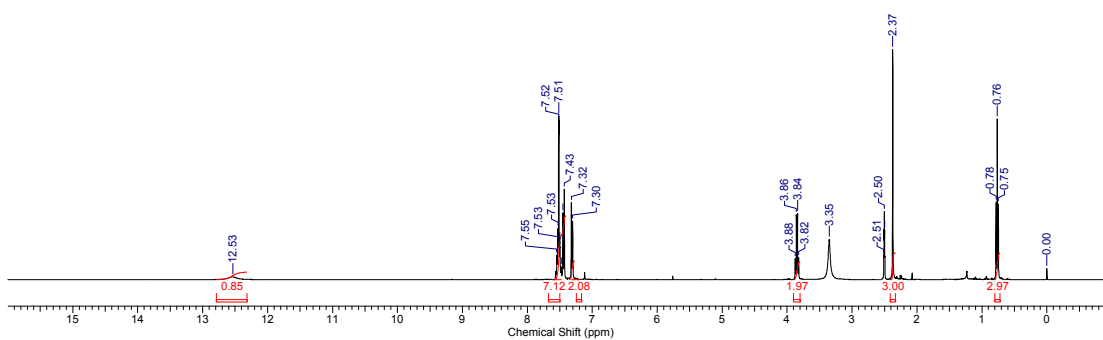

Figure S56. <sup>1</sup>H NMR spectrum of compound **4z** in DMSO-*d*<sub>6</sub>

6320-K229-C.esp

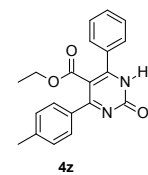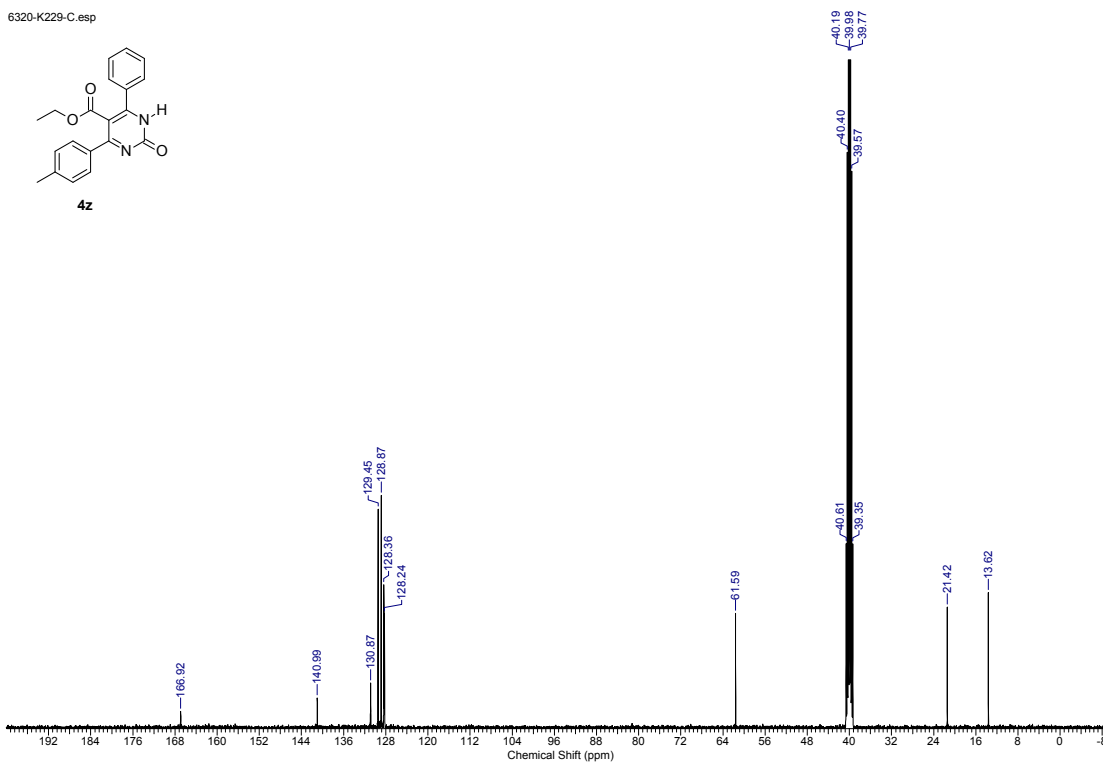

Figure S57. <sup>13</sup>C NMR spectrum of compound **4z** in DMSO-*d*<sub>6</sub>

## 6. Determination of Structure of 4a

The structure of **4a** was determined by the X-ray diffraction. Recrystallized from dichloromethane/n-hexane. Further information can be found in the CIF file. This crystal was deposited in the Cambridge Crystallographic Data Centre and assigned as CCDC 1907956.

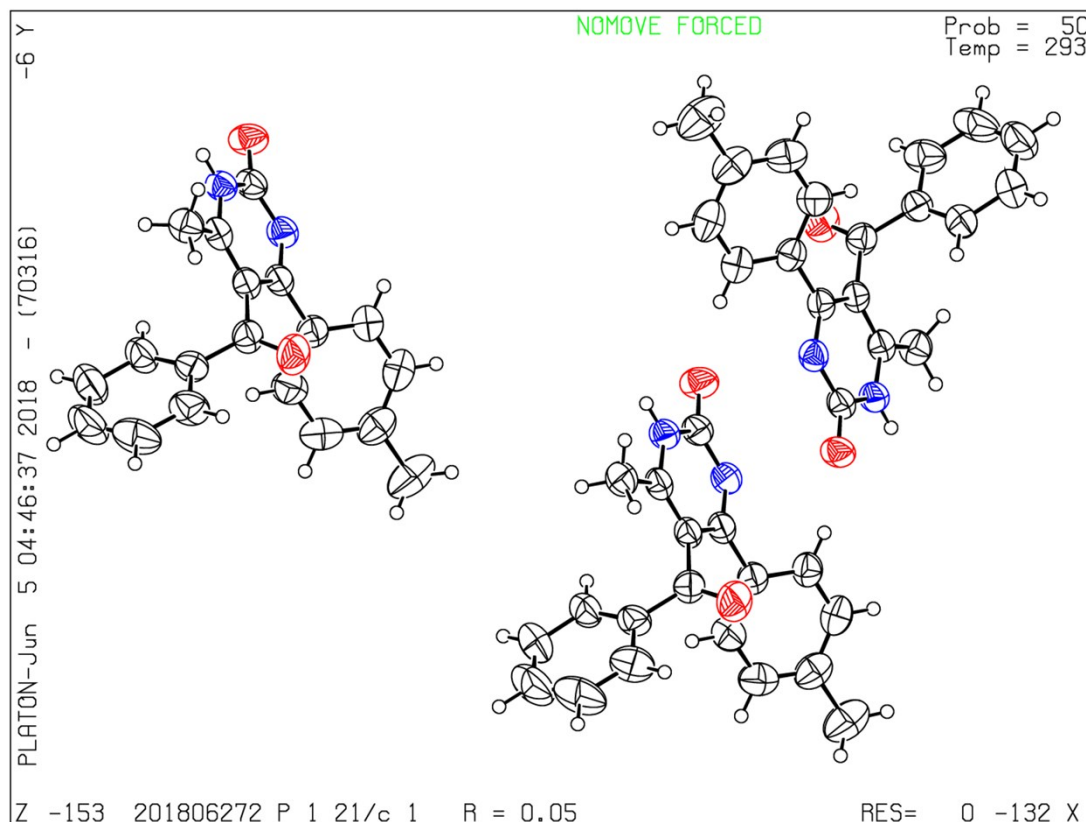

**Table 1 Crystal data and structure refinement for 201806272.**

|                       |                                                               |
|-----------------------|---------------------------------------------------------------|
| Identification code   | 201806272                                                     |
| Empirical formula     | C <sub>19</sub> H <sub>16</sub> N <sub>2</sub> O <sub>2</sub> |
| Formula weight        | 304.34                                                        |
| Temperature/K         | 293(2)                                                        |
| Crystal system        | monoclinic                                                    |
| Space group           | P2 <sub>1</sub> /c                                            |
| a/Å                   | 17.9538(2)                                                    |
| b/Å                   | 13.0669(2)                                                    |
| c/Å                   | 21.0038(3)                                                    |
| α/°                   | 90                                                            |
| β/°                   | 96.8682(13)                                                   |
| γ/°                   | 90                                                            |
| Volume/Å <sup>3</sup> | 4892.17(12)                                                   |
| Z                     | 12                                                            |

|                                                |                                                               |
|------------------------------------------------|---------------------------------------------------------------|
| $\rho_{\text{calc}}/\text{cm}^3$               | 1.240                                                         |
| $\mu/\text{mm}^{-1}$                           | 0.656                                                         |
| F(000)                                         | 1920.0                                                        |
| Crystal size/ $\text{mm}^3$                    | $0.17 \times 0.14 \times 0.1$                                 |
| Radiation                                      | CuK $\alpha$ ( $\lambda = 1.54184$ )                          |
| 2 $\Theta$ range for data collection/          | 7.984 to 141.69                                               |
| Index ranges                                   | $-21 \leq h \leq 17, -15 \leq k \leq 14, -22 \leq l \leq 25$  |
| Reflections collected                          | 22248                                                         |
| Independent reflections                        | 9225 [ $R_{\text{int}} = 0.0229, R_{\text{sigma}} = 0.0268$ ] |
| Data/restraints/parameters                     | 9225/0/628                                                    |
| Goodness-of-fit on $F^2$                       | 1.033                                                         |
| Final R indexes [ $I \geq 2\sigma(I)$ ]        | $R_1 = 0.0511, wR_2 = 0.1457$                                 |
| Final R indexes [all data]                     | $R_1 = 0.0729, wR_2 = 0.1660$                                 |
| Largest diff. peak/hole / $e \text{ \AA}^{-3}$ | 0.19/-0.17                                                    |
